# Supplementary material
Source: PubMed Central journal article supplement (PMC4253970)

|        |          |        |    |    |                           |        |        |        |      |      |      |
|--------|----------|--------|----|----|---------------------------|--------|--------|--------|------|------|------|
| U00129 | Allergic | Male   | 25 | 10 | Black                     | n.a.   | n.a.   | n.a.   | n.a. | n.a. | n.a. |
| U00140 | Allergic | Male   | 31 | 10 | 1/2 Asian<br>1/2 White    | n.a.   | n.a.   | n.a.   | n.a. | n.a. | n.a. |
| U00147 | Allergic | Male   | 25 | 10 | Asian/Pacific<br>Islander | n.a.   | n.a.   | n.a.   | n.a. | n.a. | n.a. |
| U00150 | Allergic | Female | 21 | 20 | Asian/Pacific<br>Islander | n.a.   | n.a.   | n.a.   | n.a. | n.a. | n.a. |
| U00151 | Allergic | Male   | 25 | 30 | Asian/Pacific<br>Islander | n.a.   | n.a.   | n.a.   | n.a. | n.a. | n.a. |
| U00153 | Allergic | Female | 23 | 10 | Asian/Pacific<br>Islander | n.a.   | n.a.   | n.a.   | n.a. | n.a. | n.a. |
| D00089 | Allergic | Female | 67 | 12 | White                     | n.a.   | n.a.   | n.a.   | n.a. | n.a. | n.a. |
| D00092 | Allergic | Female | 44 | 6  | Hispanic                  | n.a.   | n.a.   | n.a.   | n.a. | n.a. | n.a. |
| D00015 | Allergic | Female | 45 | 7  | Hispanic                  | n.a.   | n.a.   | n.a.   | n.a. | n.a. | n.a. |
| U00001 | Allergic | Female | 25 | 12 | White                     | n.a.   | n.a.   | n.a.   | n.a. | n.a. | n.a. |
| D00168 | Allergic | Male   | 44 | 21 | White                     | n.a.   | n.a.   | n.a.   | n.a. | n.a. | n.a. |
| D00083 | Allergic | Female | 45 | 10 | White                     | n.a.   | n.a.   | n.a.   | n.a. | n.a. | n.a. |
| U00114 | Allergic | Male   | 34 | 10 | Asian/Pacific<br>Islander | n.a.   | n.a.   | n.a.   | n.a. | n.a. | n.a. |
| D00169 | Allergic | Female | 46 | 9  | White                     | n.a.   | n.a.   | n.a.   | n.a. | n.a. | n.a. |
| D00172 | Allergic | Female | 60 | 12 | White                     | n.a.   | n.a.   | n.a.   | n.a. | n.a. | n.a. |
| D00158 | Allergic | Male   | 31 | 31 | White                     | n.a.   | n.a.   | n.a.   | n.a. | n.a. | n.a. |
| D00170 | Allergic | Male   | 47 | 37 | White                     | n.a.   | n.a.   | n.a.   | n.a. | n.a. | n.a. |
| D00122 | Allergic | Female | 41 | 20 | White                     | n.a.   | n.a.   | n.a.   | n.a. | n.a. | n.a. |
| D00160 | Allergic | Female | 49 | 31 | Black                     | n.a.   | n.a.   | n.a.   | n.a. | n.a. | n.a. |
| D00171 | Allergic | Male   | 64 | 14 | White                     | n.a.   | n.a.   | n.a.   | n.a. | n.a. | n.a. |
| D00017 | SIT      | Female | 67 | 14 | White                     | T/G/W* | 12-Aug | 1:10** | 4    | C*** | Yes  |
| D00031 | SIT      | Female | 44 | 7  | Hispanic                  | T/GW/D | 11-Aug | 1:10   | 3    | C    | Yes  |

|        |     |        |    |    |                           |                |            |       |   |      |     |
|--------|-----|--------|----|----|---------------------------|----------------|------------|-------|---|------|-----|
| D00044 | SIT | Female | 54 | 8  | White                     | T/G/W          | 8-Mar      | 1:10  | 5 | C    | No  |
| D00063 | SIT | Male   | 43 | 15 | Asian/Pacific<br>Islander | T/G/W/C/D      | 9-Jun      | 1:100 | 3 | R    | No  |
| D00072 | SIT | Female | 59 | 8  | White                     | T/G/W/C/D      | 12-Jul     | 1:10  | 5 | C    | Yes |
| D00080 | SIT | Male   | 40 | 25 | White                     | T/G/W/C/D/DM   | 13-Aug     | 1:10  | 5 | C    | Yes |
| D00087 | SIT | Male   | 40 | 18 | White                     | T/G/W/C/D      | 12-Sep     | 1:10  | 3 | R    | Yes |
| D00093 | SIT | Female | 43 | 10 | White                     | T/G/W          | 11-Sep     | 1:10  | 2 | C    | No  |
| D00101 | SIT | Male   | 49 | 17 | White                     | T/G/W/C        | 11-Sep     | 1:10  | 2 | C    | Yes |
| D00106 | SIT | Female | 42 | 9  | White                     | T/G/D          | 11-Sep     | 1:10  | 2 | R    | Yes |
| D00109 | SIT | Female | 33 | 10 | Black                     | T/G/W/C/D/M    | 13-Sep     | 1:10  | 4 | R    | Yes |
| D00111 | SIT | Male   | 50 | 11 | White                     | T/G/W/DM       | 12-Sep     | 1:10  | 3 | C    | Yes |
| D00114 | SIT | Female | 52 | 11 | White                     | G/W/DM/C/D/M   | 12-Sep     | 1:10  | 3 | R    | No  |
| D00116 | SIT | Male   | 54 | 14 | White                     | T/G/W/C/D      | 11-Apr     | 1:10  | 7 | C    | Yes |
| D00119 | SIT | Female | 59 | 12 | White                     | G/W/C/DM       | 12-Jul     | 1:10  | 5 | C    | Yes |
| D00120 | SIT | Female | 67 | 16 | Declined to<br>answer     | T/G/W          | 10-current | 1:10  | 3 | R    | Yes |
| D00126 | SIT | Male   | 44 | 17 | White                     | T/G/W/C/D/DM/M | 10-current | 1:10  | 3 | R    | Yes |
| D00129 | SIT | Female | 23 | 17 | White                     | T/G/W/C        | 11-current | 1:10  | 2 | C    | Yes |
| D00130 | SIT | Male   | 40 | 15 | White                     | T/G/W/C/D/DM   | 12-Aug     | 1:10  | 4 | C    | Yes |
| D00132 | SIT | Male   | 44 | 11 | White                     | n.a.           | 12-current | n.a.  | 1 | n.a. | Yes |
| D00133 | SIT | Male   | 40 | 11 | White                     | T/G/W/C/D      | 12-Sep     | 1:10  | 3 | R    | Yes |
| D00134 | SIT | Female | 59 | 15 | White                     | T/G/W          | 11-Sep     | 1:10  | 2 | R    | Yes |
| D00135 | SIT | Male   | 51 | 13 | White                     | T/G/C/D/M      | 12-current | n.a.  | 1 | n.a. | Yes |
| D00136 | SIT | Female | 67 | 10 | White                     | T/G/C/D        | 12-current | n.a.  | 1 | n.a. | Yes |
| D00142 | SIT | Female | 29 | 5  | White                     | T/G/W/M        | 12-current | 1:10  | 1 | R    | Yes |

|        |     |        |    |    |          |                |            |       |   |      |     |
|--------|-----|--------|----|----|----------|----------------|------------|-------|---|------|-----|
| D00143 | SIT | Female | 53 | 7  | White    | T/G/W/C/D/DM   | 13-Aug     | 1:10  | 5 | R    | Yes |
| D00144 | SIT | Male   | 35 | 9  | White    | T/G/W          | 12-current | 1:10  | 1 | R    | Yes |
| D00146 | SIT | Male   | 31 | 7  | Black    | T/G/W/C/D      | 12-current | 1:10  | 1 | C    | Yes |
| D00147 | SIT | Male   | 32 | 6  | White    | T/G/C/D        | 12-current | 1:10  | 2 | R    | Yes |
| D00148 | SIT | Female | 46 | 10 | Black    | G/C/D          | 12-current | n.a.  | 1 | n.a. | No  |
| D00150 | SIT | Female | 47 | 6  | White    | T/G/W          | 12-Oct     | 1:100 | 2 | C    | Yes |
| D00151 | SIT | Female | 52 | 9  | White    | T/G/C/D        | 12-current | n.a.  | 1 | n.a. | No  |
| D00152 | SIT | Female | 39 | 10 | White    | T/G/W/C/D/M    | 12-current | 1:10  | 2 | C    | Yes |
| D00153 | SIT | Male   | 46 | 5  | White    | T/G/C          | 10-current | 1:10  | 3 | C    | Yes |
| D00155 | SIT | Male   | 28 | 9  | Black    | T/G/DM         | 12-current | n.a.  | 1 | n.a. | Yes |
| D00157 | SIT | Female | 26 | 10 | White    | T/G/W/C/D/DM   | 12-current | 1:10  | 1 | R    | Yes |
| D00162 | SIT | Female | 57 | 7  | White    | G/C            | 12-current | n.a.  | 1 | n.a. | Yes |
| U00065 | SIT | Female | 22 | 8  | White    | C/G/T/W        | 9-Aug      | 1:10  | 1 | C    | Yes |
| U00141 | SIT | Female | 33 | 3  | Hispanic | C/D/DM/G/T/W   | 11-Sep     | 1:10  | 2 | C    | Yes |
| U00158 | SIT | Female | 32 | 4  | White    | C/D/DM/G/T/W/M | 12-Oct     | 1:10  | 2 | C    | Yes |

\*T: trees; G: grasses; W: weeds; C: cats; D: dogs; DM: dust mites; M: molds

\*\* : 1:10 dilution of the full allergen concentration supplied by the vendor for IT

\*\*\*R: Rush immunotherapy; C: conventional immunotherapy

| Controls |            |            |            |            |            |            |            |            |            |            |            |            |
|----------|------------|------------|------------|------------|------------|------------|------------|------------|------------|------------|------------|------------|
| ID       | DRB1       | DRB1       | DRB3/4/5   | DRB3/4/5   | DQA1       | DQA1       | DQB1       | DQB1       | DPA1       | DPA1       | DPB1       | DPB1       |
| D00008   | DRB1*13:01 | DRB1*15:01 | DRB3*02:02 | DRB5*01:01 | DQA1*01:02 | DQA1*01:03 | DQB1*06:02 | DQB1*06:03 | DPA1*01:03 | DPA1*01:03 | DPB1*02:01 | DPB1*20:01 |
| D00015   | DRB1*15:01 | DRB1*16:02 | DRB5*01:01 | DRB5*02:02 |            |            | DQB1*03:01 | DQB1*06:02 |            |            | DPB1*02:01 | DPB1*04:01 |
| D00016   | DRB1*01:02 | DRB1*04:02 |            | DRB4*01:03 | DQA1*01:01 | DQA1*03:01 | DQB1*03:02 | DQB1*05:01 | DPA1*01:03 | DPA1*01:03 | DPB1*04:01 | DPB1*04:01 |
| D00045   | DRB1*08:04 | DRB1*15:01 |            | DRB5*01:01 | DQA1*01:02 | DQA1*04:01 | DQB1*04:02 | DQB1*06:02 | DPA1*01:03 | DPA1*01:03 | DPB1*04:01 | DPB1*04:02 |
| D00052   | DRB1*07:01 | DRB1*15:01 | DRB4*01:03 | DRB5*01:01 | DQA1*01:02 | DQA1*02:01 | DQB1*06:02 | DQB1*06:02 | DPA1*01:03 | DPA1*01:03 | DPB1*04:01 | DPB1*51:01 |
| D00067   | DRB1*13:02 | DRB1*15:01 | DRB3*01:01 | DRB5*01:01 | DQA1*01:02 | DQA1*01:02 | DQB1*06:02 | DQB1*06:04 | DPA1*01:03 | DPA1*01:03 | DPB1*04:01 | DPB1*04:01 |
| D00073   | DRB1*03:01 | DRB1*08:04 | DRB3*02:02 |            | DQA1*04:01 | DQA1*05:01 | DQB1*02:01 | DQB1*03:19 | DPA1*02:01 | DPA1*02:02 | DPB1*01:01 | DPB1*01:01 |
| D00083   | DRB1*11:04 | DRB1*13:02 | DRB3*02:02 | DRB3*03:01 |            |            | DQB1*03:01 | DQB1*06:04 |            |            | DPB1*04:01 | DPB1*14:01 |
| D00084   | DRB1*07:01 | DRB1*07:01 | DRB4*01:01 | DRB4*01:03 | DQA1*02:01 | DQA1*02:01 | DQB1*02:02 | DQB1*03:03 | DPA1*01:03 | DPA1*01:03 | DPB1*04:01 | DPB1*04:01 |
| D00089   | DRB1*03:01 | DRB1*11:04 | DRB3*01:01 | DRB3*02:02 |            |            | DQB1*02:01 | DQB1*03:01 |            |            | DPB1*03:01 | DPB1*04:01 |
| D00090   | DRB1*11:01 | DRB1*11:04 | DRB3*02:02 | DRB3*02:02 | DQA1*05:01 | DQA1*05:05 | DQB1*03:01 | DQB1*03:01 | DPA1*02:01 | DPA1*02:01 | DPB1*10:01 | DPB1*10:01 |
| D00092   | DRB1*01:01 | DRB1*08:02 |            |            |            |            | DQB1*04:02 | DQB1*05:01 |            |            | DPB1*04:01 |            |
| D00096   | DRB1*04:07 | DRB1*03:02 | DRB3*03:01 | DRB4*01:03 | DQA1*01:02 | DQA1*03:03 | DQB1*03:01 | DQB1*06:09 | DPA1*01:03 | DPA1*01:03 | DPB1*02:01 | DPB1*03:01 |
| D00102   | DRB1*03:01 | DRB1*04:01 | DRB3*02:02 | DRB4*01:03 | DQA1*03:01 | DQA1*05:01 | DQB1*02:01 | DQB1*03:02 | DPA1*01:03 | DPA1*02:02 | DPB1*01:01 | DPB1*02:02 |
| D00104   | DRB1*04:01 | DRB1*13:01 | DRB3*01:01 | DRB4*01:03 | DQA1*01:03 | DQA1*03:03 | DQB1*03:01 | DQB1*06:03 | DPA1*01:03 | DPA1*01:03 | DPB1*02:01 | DPB1*04:01 |
| D00117   | DRB1*08:01 | DRB1*15:01 |            | DRB5*01:01 | DQA1*01:02 | DQA1*04:01 | DQB1*04:02 | DQB1*06:02 | DPA1*01:03 | DPA1*01:03 | DPB1*04:01 | DPB1*04:01 |
| D00168   | DRB1*07:01 | DRB1*10:03 | DRB4*01:01 | DRB4*01:01 | DQA1*01:01 | DQA1*01:06 | DQB1*02:02 | DQB1*05:01 | DPA1*01:03 | DPA1*01:03 | DPB1*02:01 | DPB1*04:01 |
| D00169   | DRB1*13:02 | DRB1*15:01 | DRB3*03:01 | DRB5*01:01 | DQA1*01:02 | DQA1*01:02 | DQB1*06:02 | DQB1*06:04 | DPA1*01:03 | DPA1*02:01 | DPB1*01:01 | DPB1*03:01 |
| U00001   | DRB1*03:01 | DRB1*07:01 | DRB3*01:01 | DRB4*01:03 |            |            | DQB1*02:01 | DQB1*02:02 |            |            | DPB1*04:01 | DPB1*04:01 |
| U00032   | DRB1*09:01 | DRB1*11:01 | DRB3*02:02 | DRB4*01:03 | DQA1*03:02 | DQA1*05:05 | DQB1*03:01 | DQB1*03:03 | DPA1*02:01 | DPA1*02:02 | DPB1*05:01 | DPB1*14:01 |
| U00034   | DRB1*04:03 | DRB1*15:01 | DRB4*01:03 | DRB5*01:01 | DQA1*01:02 | DQA1*03    | DQB1*03:02 | DQB1*06:02 | DPA1*01:03 | DPA1*01:03 | DPB1*04:01 | DPB1*04:01 |
| U00036   | DRB1*03:01 | DRB1*07:01 | DRB3*01:01 | DRB4*01:03 | DQA1*02:01 | DQA1*05:01 | DQB1*02:01 | DQB1*02:02 | DPA1*01:03 | DPA1*01:03 | DPB1*04:01 | DPB1*04:01 |
| U00058   | DRB1*03:01 | DRB1*13:01 | DRB3*01:01 | DRB3*02:02 | DQA1*01:03 | DQA1*05:01 | DQB1*02:01 | DQB1*06:03 | DPA1*01:03 | DPA1*01:03 | DPB1*04:01 | DPB1*04:01 |
| U00095   | DRB1*04:02 | DRB1*04:04 | DRB4*01:03 | DRB4*01:03 | DQA1*03:01 | DQA1*03    | DQB1*03:02 | DQB1*04:02 | DPA1*01:03 | DPA1*01:03 | DPB1*04:01 | DPB1*04:02 |
| U00098   | DRB1*03:01 | DRB1*07:01 | DRB3*02:02 | DRB4*01:03 | DQA1*02:01 | DQA1*05:01 | DQB1*02:01 | DQB1*02:02 | DPA1*01:03 | DPA1*02:01 | DPB1*04:01 | DPB1*26:01 |
| U00106   | DRB1*04:04 | DRB1*07:01 | DRB4*01:03 | DRB4*01:03 | DQA1*02:01 | DQA1*03:01 | DQB1*02:02 | DQB1*03:02 | DPA1*01:03 | DPA1*02:01 | DPB1*04:01 | DPB1*14:01 |

|        |             |             |            |            |             |             |             |             |             |             |             |             |
|--------|-------------|-------------|------------|------------|-------------|-------------|-------------|-------------|-------------|-------------|-------------|-------------|
| U00114 | DRB1*12:01  | DRB1*15:06  | DRB3*02:02 | DRB5*01:01 | DQA1*01:02  | DQA1*05:05  | DQB1*03:01  | DQB1*05:02  | DPA1*01:03  | DPA1*02:02  | DPB1*02:01  | DPB1*13:01  |
| U00125 | DRB1*03:01  | DRB1*08:02  | DRB3*02:02 |            | DQA1*03:01  | DQA1*05:01  | DQB1*02:01  | DQB1*03:02  | DPA1*01:03  | DPA1*02:02  | DPB1*04:01  | DPB1*05:01  |
| U00129 | DRB1*04:07  | DRB1*11:01  | DRB3*02:02 | DRB4*01:03 | DQA1*03:03  | DQA1*05:05  | DQB1*03:01  | DQB1*03:19  | DPA1*01:03  | DPA1*02:01  | DPB1*01:01  | DPB1*03:01  |
| U00140 | DRB1*11:01  | DRB1*13:02  | DRB3*02:02 | DRB3*03:01 | DQA1*01:02  | DQA1*05:05  | DQB1*03:01  | DQB1*06:09  | DPA1*01:03  | DPA1*02:01  | DPB1*04:02  | DPB1*09:01  |
| U00147 | DRB1*08:02  | DRB1*15:01  |            | DRB5*01:01 | DQA1*01:02  | DQA1*04:01  | DQB1*06:02  | DQB1*06:02  | DPA1*01:03  | DPA1*01:03  | DPB1*02:01  | DPB1*02:01  |
| U00150 | DRB1*11:01  | DRB1*15:01  | DRB3*02:02 | DRB5*01:01 | DQA1*01:02  | DQA1*05:05  | DQB1*03:01  | DQB1*06:01  | DPA1*01:03  | DPA1*02:02  | DPB1*03:01  | DPB1*05:01  |
| U00151 | DRB1*12:02  | DRB1*15:01  | DRB3*03:01 | DRB5*01:01 | DQA1*01:02  | DQA1*06:01  | DQB1*03:01  | DQB1*06:01  | DPA1*01:03  | DPA1*02:02  | DPB1*05:01  | DPB1*21:01  |
| U00153 | DRB1*15:02  | DRB1*15:02  | DRB5*01:01 | DRB5*01:08 | DQA1*01:02  | DQA1*01:02  | DQB1*05:02  | DQB1*05:02  | DPA1*02:02  | DPA1*02:02  | DPB1*01:01  | DPB1*05:01  |
| D00158 | DRB1* 03:01 | DRB1* 15:01 | DRB3*01:01 | DRB5*01:01 | DQA1* 01:02 | DQA1* 05:01 | DQB1* 02:01 | DQB1* 06:02 | DPA1* 01:03 | DPA1* 02:01 | DPB1* 04:01 | DPB1* 11:01 |
| D00160 | DRB1* 07:01 | DRB1* 11:01 | DRB3*02:02 | DRB4*01:03 | DQA1* 02:01 | DQA1* 05:05 | DQB1* 02:01 | DQB1* 02:02 | DPA1* 02:01 | DPA1* 02:01 | DPB1* 11:01 | DPB1* 17:01 |
| D00122 | n.d.        | n.d.        | n.d.       | n.d.       | n.d.        | n.d.        | n.d.        | n.d.        | n.d.        | n.d.        | n.d.        | n.d.        |
| D00170 | n.d.        | n.d.        | n.d.       | n.d.       | n.d.        | n.d.        | n.d.        | n.d.        | n.d.        | n.d.        | n.d.        | n.d.        |
| D00171 | n.d.        | n.d.        | n.d.       | n.d.       | n.d.        | n.d.        | n.d.        | n.d.        | n.d.        | n.d.        | n.d.        | n.d.        |
| D00172 | n.d.        | n.d.        | n.d.       | n.d.       | n.d.        | n.d.        | n.d.        | n.d.        | n.d.        | n.d.        | n.d.        | n.d.        |

## SIT

| ID     | DRB1       | DRB1       | DRB3/4/5   | DRB3/4/5   | DQA1       | DQA1       | DQB1       | DQB1       | DPA1       | DPA1       | DPB1       | DPB1       |
|--------|------------|------------|------------|------------|------------|------------|------------|------------|------------|------------|------------|------------|
| D00017 | DRB1*03:01 | DRB1*11:04 | DRB3*01:01 | DRB3*02:02 |            |            | DQB1*02:01 | DQB1*03:01 |            |            | DPB1*03:01 | DPB1*04:01 |
| D00031 | DRB1*01:01 | DRB1*08:02 |            |            |            |            | DQB1*04:02 | DQB1*05:01 |            |            | DPB1*04:01 |            |
| D00044 | DRB1*04:01 | DRB1*15:01 | DRB4*01:03 | DRB5*01:01 |            |            | DQB1*03:01 | DQB1*06:02 |            |            | DPB1*02:01 | DPB1*04:01 |
| D00072 | DRB1*04:01 | DRB1*11:01 | DRB3*02:02 | DRB4*01:03 | DQA1*03    | DQA1*05    | DQB1*03:01 | DQB1*03:01 | DPA1*01:03 | DPA1*01:03 | DPB1*04:01 | DPB1*04:02 |
| D00087 | DRB1*04:01 | DRB1*11:01 | DRB3*02:02 | DRB4*01:03 | DQA1*03:03 | DQA1*05:09 | DQB1*03:01 | DQB1*03:02 | DPA1*01:03 | DPA1*02:01 | DPB1*03:01 | DPB1*14:01 |
| D00093 | DRB1*01:01 | DRB1*15:01 | DRB5*01:01 |            |            |            | DQB1*05:01 | DQB1*06:02 |            |            | DPB1*04:02 | DPB1*09:01 |
| D00101 | DRB1*03:01 | DRB1*13:02 | DRB3*01:01 | DRB3*03:01 | DQA1*05:01 | DQA1*01:02 | DQB1*02:01 | DQB1*06:04 | DPA1*01:03 | DPA1*02:01 | DPB1*05:01 | DPB1*01:01 |
| D00106 | DRB1*03:01 | DRB1*08:01 | DRB3*01:01 | DRB3*01:01 | DQA1*04:03 | DQA1*05:01 | DQB1*02:01 | DQB1*04:02 | DPA1*01:03 | DPA1*02:01 | DPB1*01:01 | DPB1*04:02 |
| D00109 | DRB1*08:04 | DRB1*15:03 |            | DRB5*01:01 | DQA1*01:02 | DQA1*05:05 | DQB1*03:01 | DQB1*06:02 | DPA1*01:03 | DPA1*02:01 | DPB1*02:01 | DPB1*11:01 |
| D00111 | DRB1*03:01 | DRB1*15:01 | DRB3*01:01 | DRB5*01:01 | DQA1*01:02 | DQA1*05:01 | DQB1*02:01 | DQB1*06:02 | DPA1*01:03 | DPA1*01:03 | DPB1*02:01 | DPB1*03:01 |
| D00116 | DRB1*04:01 | DRB1*15:01 | DRB4*01:03 | DRB5*01:01 | DQA1*01:02 | DQA1*03:01 | DQB1*03:02 | DQB1*06:02 | DPA1*01:03 | DPA1*01:03 | DPB1*02:01 | DPB1*04:01 |
| D00119 | DRB1*04:01 | DRB1*11:01 | DRB3*02:02 | DRB4*01:03 | DQA1*03    | DQA1*05    | DQB1*03:01 | DQB1*03:01 | DPA1*01:03 | DPA1*01:03 | DPB1*04:01 | DPB1*04:02 |



ACCEPTED MANUSCRIPT



| Peptide sequence             | LQGPFFRFLTEKGMKNVFDVVEKY<br>TIG | AVQVFTVQKGSDPKLVLNIKYTRPGD<br>SL | EEWEPLTKGNVWEV | NVWEVKSSKPLVGPFF | LVGPFNFRFMSKGGMRNVFDEVIPT | INAGFKAAALAAAAGVPPADKY | AFKVAATAANAAPAN | PANDKFTVFEAAFNDAIKE | ATVATAPEVKYTVFETALKKAITAMS | STWYGKPTGAGPKDN |
|------------------------------|---------------------------------|----------------------------------|----------------|------------------|---------------------------|------------------------|-----------------|---------------------|----------------------------|-----------------|
| Pool                         | P20                             | P20                              | P20            | P20              | P20                       | P20                    | P20             | P20                 | P20                        | P20             |
| Protein                      | Phl p 2                         | Phl p 3                          | Phl p 3        | Phl p 3          | Phl p 3                   | Phl p 5a/5b            | Phl p 5a        | Phl p 5a/5b         | Phl p 5a/5b                | Phl p 1         |
| <b>DPA1*01:03/DPB1*03:01</b> | 226.2                           | 41.7                             | 26158.5        | 5889.2           | 290.7                     | 48.5                   | 26.9            | 660.8               | 2348.6                     | 3887.4          |
| <b>DPB1*02:01</b>            | 103.8                           | 103.5                            | 18002.6        | 9616.8           | 25.7                      | 4486.4                 | 27973.6         | 100.0               | 2.2                        | 7459.3          |
| <b>DPB1*20:01</b>            | 74.2                            | 18.2                             | 12918.0        | 2912.7           | 48.7                      | 33.9                   | 7.7             | 491.2               | 1011.0                     | 3193.6          |
| <b>DRB1*04:05</b>            | 199.1                           | 487.2                            | 32308.4        | 10366.8          | 814.7                     | 208.3                  | 183.2           | 51.1                | 110.2                      | 4568.5          |
| <b>DRB1*15:01</b>            | 811.9                           | 216.9                            | 30341.6        | 4634.2           | 150.0                     | 62.2                   | 10928.6         | 604.6               | 128.4                      | 13661.1         |
| <b>DRB1*04:01</b>            | 121.3                           | 1822.9                           | 14260.2        | 2961.7           | 1615.5                    | 5.4                    | 5.8             | 72.7                | 22.3                       | 2448.7          |
| <b>DRB1*04:04</b>            | 958.7                           | 121.5                            | <46728.9       | 862.6            | 1388.8                    | 150.7                  | 47.3            | 287.6               | 44.2                       | 5390.3          |
| <b>DRB1*01:01</b>            | 13.8                            | 31.5                             | 990.5          | 261.5            | 32.1                      | 1.0                    | 6.3             | 12.9                | 53.4                       | 366.4           |
| <b>DRB1*03:01</b>            | 57.9                            | 235.1                            | 2964.9         | 5462.6           | 5174.7                    | <33358.0               | <46728.9        | 2889.9              | 938.6                      | <46728.9        |
| <b>DRB1*07:01</b>            | 2460.6                          | 92.8                             | <46728.9       | 373.5            | 216.1                     | 83.0                   | 77.1            | 222.8               | 185.4                      | 4024.3          |
| <b>DRB3*02:02</b>            | <23364.5                        | 117.6                            | 26615.3        | 20986.9          | 457.0                     | 28.2                   | 680.4           | 242.2               | 376.6                      | 5908.73         |
| <b>DRB1*10:01</b>            | 8.1                             | 43.5                             | 637.9          | 542.4            | 46.5                      | 1.9                    | 1.9             | 4.8                 | 83.9                       | 125.23          |
| <b>DRB1*08:02</b>            | 90.9                            | 9.8                              | 113.6          | 63.2             | 5.2                       | 10.7                   | 44.1            | 858.8               | 13.2                       | 34.49           |

|                              |        |          |          |          |          |          |          |          |         |          |
|------------------------------|--------|----------|----------|----------|----------|----------|----------|----------|---------|----------|
| <b>DRB4*01:01</b>            | 541.5  | 306.2    | 20595.6  | 220.2    | 474.1    | 1816.4   | 2529.6   | 693.1    | 7.3     | 17935.62 |
| <b>DQA1*01:02/DQB1*06:02</b> | 5454.7 | 542.0    | <46728.9 | 828.5    | 1308.6   | 11.7     | 95.7     | 173.6    | 82.0    | 8311.61  |
| <b>DQA1*04:01/DQB1*04:02</b> | 1652.2 | <23364.5 | <46728.9 | 4564.4   | 10055.5  | 1155.5   | 1565.2   | 656.5    | 2730.8  | 38760.85 |
| <b>DQA1*05:01/DQB1*02:01</b> | 107.0  | 6275.5   | 7915.9   | 422.9    | 43.9     | 988.3    | 1259.0   | 80.6     | 2735.7  | 5042.37  |
| <b>DQA1*01:01/DQB1*05:01</b> | 410.5  | <23364.5 | 27058.8  | <46728.9 | 28.3     | 869.5    | <46728.9 | 39.3     | 12965.9 | 1810.78  |
| <b>DPA1*03:01/DPB1*04:02</b> | 5432.2 | 2308.7   | 43033.1  | 28416.4  | 5313.4   | 1860.9   | 10123.0  | 7681.6   | 48.3    | 11104.43 |
| <b>DPA1*02:01/DPB1*01:01</b> | 251.4  | 622.7    | 21126.8  | 2921.1   | 256.3    | 830.2    | <46728.9 | 3371.5   | 15.1    | <46728.9 |
| <b>DPB1*14:01</b>            | 1865.2 | 557.9    | 22730.6  | 8378.4   | 5423.6   | 142.1    | 14.6     | 957.5    | 129.5   | 2786.13  |
| <b>DPA1*01:03/DPB1*04:01</b> | 5204.9 | 5279.1   | <46728.9 | 12514.0  | 1003.5   | 17039.7  | <46728.9 | 4054.6   | 11.0    | 5369.03  |
| <b>DRB1*16:02</b>            | 60.5   | 42.8     | 8154.7   | 107.0    | 55.1     | 23.9     | 193.6    | 15.1     | 322.6   | 864.50   |
| <b>DRB1*11:01</b>            | 111.2  | 24.2     | 645.5    | 853.7    | 27.0     | 138.7    | 197.5    | 5845.4   | 194.1   | 4710.24  |
| <b>DRB5*01:01</b>            | 43.1   | 28.2     | 5169.2   | 2421.3   | 33.9     | 41.7     | 741.3    | 499.3    | 19.8    | 7574.92  |
| <b>DPA1*02:01/DPB1*05:01</b> | 64.1   | 41.7     | 5076.0   | 4643.0   | 276.2    | 4576.1   | 548.7    | 272.4    | 10.7    | 5120.64  |
| <b>DQA1*05:01/DQB1*03:01</b> | 7369.9 | 211.5    | 8015.9   | 34.7     | 523.6    | 8.8      | 16.5     | 322.3    | 89.0    | 102.43   |
| <b>DQA1*03:01/DQB1*03:02</b> | 1191.3 | 3088.7   | 39460.0  | 1601.7   | 4465.7   | 481.3    | 3347.3   | 181.0    | 1647.9  | 10548.54 |
| <b>DRB1*12:01</b>            | 236.9  | 503.3    | <46728.9 | 9435.9   | 1978.6   | 5931.2   | <46728.9 | <36855.0 | 668.5   | 28922.24 |
| <b>DRB1*13:02</b>            | 400.6  | 119.0    | 5660.5   | 58.0     | 294.6    | 251.2    | 49.6     | 239.2    | 387.1   | 16279.77 |
| <b>DRB1*09:01</b>            | 393.6  | 472.7    | 21501.5  | 2037.7   | 115.4    | 14.6     | 108.7    | 77.8     | 128.9   | 3559.64  |
| <b>DRB3*01:01</b>            | 2568.1 | <23348.1 | <46728.9 | <46728.9 | <28019.1 | <33355.6 | <46728.9 | 407.0    | 7050.8  | 19106.03 |

| Peptide sequence             |          |         |          |          |         |          |         |          |             |          |
|------------------------------|----------|---------|----------|----------|---------|----------|---------|----------|-------------|----------|
| KPPFSGMTGCCNTPI              |          |         |          |          |         |          |         |          |             |          |
| FEIKCTKPEACSGEPVVVHI         |          |         |          |          |         |          |         |          |             |          |
| SGIAFGSMAKKGDEQ              |          |         |          |          |         |          |         |          |             |          |
| GELELQFRRVKCKYP              |          |         |          |          |         |          |         |          |             |          |
| TFHVEKGSNPNYLALLVKYVNGDGD    |          |         |          |          |         |          |         |          |             |          |
| EHGSEWVAMTKGEGGVWTF          |          |         |          |          |         |          |         |          |             |          |
| NRRNNTFKPFAEYKSDYVYQPPFK     |          |         |          |          |         |          |         |          |             |          |
| VIPAGELQVIEKVDAAFKVA         |          |         |          |          |         |          |         |          |             |          |
| AYESYKFIPALEAAVKQAYAAATVAAA  |          |         |          |          |         |          |         |          |             |          |
| LAKYKANWIEIMRIK              |          |         |          |          |         |          |         |          |             |          |
| Pool                         | P20      | P20     | P20      | P20      | P20     | P20      | P20     | P20      | P20         | P20      |
| Protein                      | Phl p 1  | Phl p 1 | Phl p 1  | Phl p 1  | Phl p 1 | Phl p 2  | Phl p 4 | Phl p 5a | Phl p 5a/5b | Phl p 13 |
| <b>DPA1*01:03/DPB1*03:01</b> | <46728.9 | 457.9   | 12834.8  | 11849.0  | 17589.7 | <46728.9 | 2020.0  | 9752.8   | 4.2         | 246.9    |
| <b>DPB1*02:01</b>            | 35448.5  | 12169.8 | <46728.9 | 181.4    | 85.9    | 7066.0   | 45.6    | 1103.6   | 404.2       | 95.3     |
| <b>DPB1*20:01</b>            | 16060.3  | 1313.9  | 33279.9  | 8655.0   | 18194.5 | 27906.0  | 861.7   | 13547.5  | 44.1        | 4592.3   |
| <b>DRB1*04:05</b>            | 2905.2   | 771.8   | 32247.9  | 34441.7  | 55.7    | 4265.0   | 926.2   | 1487.6   | 9.3         | 485.5    |
| <b>DRB1*15:01</b>            | 3947.5   | 1781.1  | 3794.8   | 4532.2   | 84.1    | 3750.6   | 12.6    | 135.5    | 146.8       | 503.5    |
| <b>DRB1*04:01</b>            | 1099.5   | 478.7   | 15304.5  | 15880.6  | 683.8   | 954.7    | 92.5    | 111.5    | 11.5        | 279.3    |
| <b>DRB1*04:04</b>            | 2107.4   | 1733.2  | 4174.8   | 18554.3  | 59.1    | 1191.7   | 17297.8 | 187.2    | 54.6        | 106.5    |
| <b>DRB1*01:01</b>            | 81.8     | 460.4   | 250.9    | 7305.9   | 7.0     | 51.3     | 96.5    | 51.8     | 1.2         | 20.8     |
| <b>DRB1*03:01</b>            | 44207.1  | 26820.5 | <46728.9 | 5889.1   | 35480.6 | <46728.9 | 6427.2  | 141.1    | 33.7        | 1401.6   |
| <b>DRB1*07:01</b>            | 8963.4   | 1546.7  | 20748.8  | 4874.0   | 253.6   | 446.0    | 1485.6  | 150.6    | 33.2        | 385.2    |
| <b>DRB3*02:02</b>            | <46728.9 | 1348.16 | 11589.77 | <46728.9 | 5012.35 | 5602.78  | 616.04  | 5659.06  | 108.67      | 16.01    |
| <b>DRB1*10:01</b>            | 4.64     | 321.74  | 808.88   | 3037.77  | 13.27   | 110.54   | 26.55   | 316.89   | 8.05        | 12.50    |
| <b>DRB1*08:02</b>            | 6989.14  | 1210.04 | 986.92   | 101.27   | 52.50   | 184.33   | 744.86  | 371.15   | 26.11       | 53.93    |

|                              |          |          |          |          |          |          |          |         |         |         |
|------------------------------|----------|----------|----------|----------|----------|----------|----------|---------|---------|---------|
| <b>DRB4*01:01</b>            | 9179.50  | 751.30   | 13321.23 | 1513.25  | 4669.89  | 350.12   | 4134.66  | 10.77   | 730.64  | 9.48    |
| <b>DQA1*01:02/DQB1*06:02</b> | 22185.87 | 8188.95  | 176.19   | 10680.69 | 1320.85  | 1195.97  | 24533.69 | 9154.38 | 14.82   | 478.77  |
| <b>DQA1*04:01/DQB1*04:02</b> | <46728.9 | 12075.71 | <46728.9 | <46728.9 | 19522.36 | 1204.09  | 14128.01 | 2584.20 | 423.31  | 8704.67 |
| <b>DQA1*05:01/DQB1*02:01</b> | 23608.96 | 8037.30  | <46728.9 | <46728.9 | 1487.26  | 835.96   | 650.41   | 1554.48 | 303.18  | 681.85  |
| <b>DQA1*01:01/DQB1*05:01</b> | 18971.27 | 32787.06 | <46728.9 | <46728.9 | 23313.13 | <46728.9 | 2120.04  | 4866.30 | 304.45  | 853.25  |
| <b>DPA1*03:01/DPB1*04:02</b> | 35353.57 | 3713.37  | <46728.9 | 10311.47 | 1171.01  | 13404.87 | 7207.50  | 837.29  | 1368.76 | 185.17  |
| <b>DPA1*02:01/DPB1*01:01</b> | <46728.9 | 6454.39  | <46728.9 | 3909.30  | 763.44   | 1514.54  | 692.04   | 1091.15 | 321.36  | 97.75   |
| <b>DPB1*14:01</b>            | 6594.13  | 7911.75  | 28361.55 | 28342.38 | 432.40   | 3815.03  | 2803.04  | 318.88  | 27.78   | 709.07  |
| <b>DPA1*01:03/DPB1*04:01</b> | 29971.72 | 10930.53 | <46728.9 | 7006.82  | 1441.71  | 25972.67 | 580.58   | 2734.11 | 1314.71 | 532.64  |
| <b>DRB1*16:02</b>            | 3605.51  | 6066.43  | 9940.53  | 4642.56  | 84.13    | 376.73   | 5.58     | 106.08  | 2.72    | 429.69  |
| <b>DRB1*11:01</b>            | 6562.64  | 3004.27  | 893.76   | 278.74   | 77.48    | 533.90   | 362.75   | 555.97  | 38.85   | 331.33  |
| <b>DRB5*01:01</b>            | 2727.33  | 7910.00  | 2724.12  | 171.57   | 1826.33  | 3492.89  | 171.43   | 22.19   | 22.52   | 317.68  |
| <b>DPA1*02:01/DPB1*05:01</b> | 12142.59 | 4314.20  | 746.80   | 3690.05  | 33.18    | 1096.27  | 248.78   | 48.79   | 7.28    | 336.22  |
| <b>DQA1*05:01/DQB1*03:01</b> | 5090.22  | 256.66   | 84.46    | 2736.57  | 92.98    | 354.92   | 8053.52  | 247.48  | 6.99    | 618.92  |
| <b>DQA1*03:01/DQB1*03:02</b> | 29901.31 | 7373.62  | 17981.88 | <46728.9 | 3184.40  | 851.69   | 9207.30  | 811.77  | 184.71  | 2586.60 |
| <b>DRB1*12:01</b>            | 14829.87 | 6155.06  | <46728.9 | 11029.57 | 89.44    | 6166.46  | 7701.28  | 194.02  | 2071.82 | 1356.89 |
| <b>DRB1*13:02</b>            | 7933.13  | 1939.94  | 31963.80 | 28776.87 | 70.50    | 618.66   | 4685.61  | 69.00   | 7.81    | 59.85   |
| <b>DRB1*09:01</b>            | 2792.29  | 5288.01  | 5318.47  | 11613.23 | 99.52    | 656.60   | 126.61   | 187.58  | 4.21    | 159.82  |
| <b>DRB3*01:01</b>            | <46728.9 | 18044.05 | <46728.9 | <46728.9 | 3378.84  | 9604.44  | 32.12    | 540.58  | 2010.78 | 440.00  |

| Peptide sequence | AAYLATRGLDWDVAV | APSGRIVMELYADV | AVMLTFDNAGMWNVR | CDASILDPLSNQSA | ELRKTYNLLDAVSRH | GDLYIFESRAICKYA | GEVLNALAYDVPIPG | HYKGSFHRVIPGFM | IGSFFYFPSIGMQRT | IIELFTAKGFTVQEM |
|------------------|-----------------|----------------|-----------------|----------------|-----------------|-----------------|-----------------|----------------|-----------------|-----------------|
|------------------|-----------------|----------------|-----------------|----------------|-----------------|-----------------|-----------------|----------------|-----------------|-----------------|

| Pool                         | P19     | P19/MNA | P19/MNA | P19     | P19/MNA  | P19    | P19      | P19/MNA  | P19/MNA | P19/MNA |
|------------------------------|---------|---------|---------|---------|----------|--------|----------|----------|---------|---------|
| Protein                      | M82     | MN26    | M76     | M81     | M76      | MN10   | MN23     | MN26     | M83     | M34     |
| <b>DPA1*01:03/DPB1*03:01</b> | 130.5   | 817.3   | 1740.2  | 313.8   | 4147.7   | 33.0   | 3697.8   | 8137.4   | 2993.6  | 1609.6  |
| <b>DPB1*02:01</b>            | 78.2    | 734.5   | 957.1   | 2595.9  | 1626.3   | 599.5  | 5388.2   | 931.8    | 89.0    | 64.3    |
| <b>DPB1*20:01</b>            | 864.9   | 848.7   | 31085.3 | 904.3   | 8061.6   | 1473.8 | <46728.9 | <46728.9 | 35007.0 | 4241.4  |
| <b>DRB1*04:05</b>            | 9.4     | 291.2   | 60.2    | 208.5   | 6.1      | 70.8   | 1046.8   | 55.7     | 0.7     | 312.6   |
| <b>DRB1*15:01</b>            | 38.3    | 289.5   | 58.5    | 363.4   | 973.5    | 0.8    | 30.0     | 1385.4   | 0.2     | 9.7     |
| <b>DRB1*04:01</b>            | 11.9    | 774.2   | 35.6    | 41.6    | 59.4     | 2523.2 | 728.2    | 739.6    | 0.4     | 744.7   |
| <b>DRB1*04:04</b>            | 390.2   | 2602.8  | 1.3     | 2.8     | 58.6     | 3.8    | 152.6    | 390.4    | 1.0     | 6.1     |
| <b>DRB1*01:01</b>            | 3.6     | 561.2   | 501.8   | 1267.9  | 13.6     | 80.3   | 104.4    | 86.5     | 2.8     | 17.4    |
| <b>DRB1*03:01</b>            | 23436.5 | 5558.7  | 1335.3  | 15.5    | <46728.9 | 82.5   | 243.9    | <46728.9 | 7492.3  | 4214.0  |
| <b>DRB1*07:01</b>            | 2.5     | 330.1   | 358.5   | 1151.8  | 130.7    | 8.0    | 60.5     | 1.3      | 2.9     | 17.5    |
| <b>DRB3*02:02</b>            | 3.2     | 4560.2  | 12.6    | 10088.7 | 464.1    | 636.8  | 9611.7   | 3906.6   | 2.7     | 4405.5  |
| <b>DRB1*10:01</b>            | 0.6     | 780.2   | 75.5    | 49.6    | 3.6      | 1279.6 | 346.4    | 9.1      | 2.9     | 18.3    |
| <b>DRB1*08:02</b>            | 111.1   | 439.8   | 2.8     | 17.7    | 54.0     | 11.0   | 56.2     | 199.9    | 0.6     | 4.6     |
| <b>DRB4*01:01</b>            | 79.2    | 949.8   | 2004.4  | 1501.4  | 37885.6  | 5523.8 | 5919.5   | 17288.9  | 78.4    | 2880.7  |

|                              |          |          |          |          |          |          |          |          |         |         |
|------------------------------|----------|----------|----------|----------|----------|----------|----------|----------|---------|---------|
| <b>DQA1*01:02/DQB1*06:02</b> | 6.4      | 65.3     | 1103.9   | 225.4    | 6684.5   | 779.0    | 413.0    | 5.8      | 1609.4  | 1376.0  |
| <b>DQA1*04:01/DQB1*04:02</b> | 5057.09  | 5438.71  | 5907.67  | 798.40   | <46728.9 | 2007.20  | 3499.44  | 8868.76  | 7348.78 | 422.82  |
| <b>DQA1*05:01/DQB1*02:01</b> | 11.03    | 10.85    | 2280.93  | 2641.30  | 6523.87  | 17960.26 | 53.64    | 296.06   | 621.43  | 216.22  |
| <b>DQA1*01:01/DQB1*05:01</b> | 855.08   | 915.51   | 73.89    | 17881.81 | 2434.67  | 865.65   | 15.74    | 2141.62  | 883.24  | 68.58   |
| <b>DPA1*03:01/DPB1*04:02</b> | 259.57   | 71.61    | 1228.95  | 2714.00  | 2304.51  | 1385.56  | 1798.34  | 45.53    | 151.67  | 108.20  |
| <b>DPA1*02:01/DPB1*01:01</b> | 6458.68  | 50.14    | 8267.17  | <46728.9 | 19820.45 | 5263.84  | 25749.24 | 522.54   | 1109.95 | 1870.51 |
| <b>DPB1*14:01</b>            | 153.32   | 32799.10 | 23700.39 | <46728.9 | 1960.54  | 5174.59  | 26116.87 | 13721.21 | 9754.48 | 1168.26 |
| <b>DPA1*01:03/DPB1*04:01</b> | 177.6    | 2.0      | 254.9    | 5337.3   | 3746.3   | 319.7    | 8995.9   | 19.5     | 64.2    | 436.1   |
| <b>DRB1*16:02</b>            | 0.26     | 2297.04  | 665.07   | 324.01   | 244.45   | 9.90     | 315.98   | 262.22   | 1.38    | 65.29   |
| <b>DRB1*11:01</b>            | 53.0     | 10998.0  | 2881.4   | 3995.1   | 1342.8   | 182.3    | 5653.9   | 349.2    | 11.9    | 495.1   |
| <b>DRB5*01:01</b>            | 24.5     | 14033.3  | 325.0    | 2871.3   | 6.5      | 14.4     | 6089.8   | 145.9    | 4.8     | 140.1   |
| <b>DPA1*02:01/DPB1*05:01</b> | 14273.02 | 7362.39  | 3679.67  | 30548.06 | 209.48   | 674.58   | 21098.74 | 23063.28 | 8964.95 | 2483.95 |
| <b>DQA1*05:01/DQB1*03:01</b> | 124.6    | 3623.8   | 3128.6   | 5596.2   | <46728.9 | 904.9    | 324.0    | 7964.9   | 4870.6  | 743.4   |
| <b>DQA1*03:01/DQB1*03:02</b> | 3522.0   | 3771.2   | 9589.5   | 382.8    | <46728.9 | 714.0    | 930.2    | 5987.0   | 10483.2 | 313.5   |
| <b>DRB1*12:01</b>            | 1069.9   | 100.0    | 2687.1   | 1332.3   | 33923.3  | 455.3    | 21.5     | 789.2    | 749.6   | 15.0    |
| <b>DRB1*13:02</b>            | 16.9     | 550.6    | 17.1     | 221.5    | 77.5     | 5.2      | 45.4     | 4.2      | 159.5   | 107.2   |
| <b>DRB1*09:01</b>            | 1.3      | 324.7    | 200.9    | 2224.5   | 643.6    | 10.9     | 52.7     | 62.1     | 0.8     | 18.3    |
| <b>DRB3*01:01</b>            | 83.9     | 550.8    | 80.3     | 136.8    | 1989.3   | 419.5    | 531.5    | 876.3    | 5.5     | 3060.1  |

Peptide sequence

LVSKLYEVVPGILTE

NFTVGRIIEIFTAKG

NGSQFFLCTAKTAWL

NPMTVFWKMAQSMT

PRRWLRFNCPELSEI

QVYPRSWSAVMLTFD

QYAKEIWGITANPVP

VKLRSSAAQVDGFY

VVSRLIPVPPFPPA

| Pool                         | P19     | P19/MNA  | P19     | P19     | P19    | P19/MNA | P19    | P19/MNA | P19     |
|------------------------------|---------|----------|---------|---------|--------|---------|--------|---------|---------|
| Protein                      | MN11    | M34      | MN26    | MN01    | MN23   | M76     | MN23   | M82     | M83     |
| <b>DPA1*01:03/DPB1*03:01</b> | 1060.2  | 799.2    | 1238.9  | 24.4    | 95.0   | 0.6     | 36.3   | 43.0    | 4.4     |
| <b>DPB1*02:01</b>            | 6.3     | 715.7    | 0.3     | 11.9    | 1044.3 | 1219.9  | 6.5    | 7657.9  | 308.5   |
| <b>DPB1*20:01</b>            | 2737.5  | 4839.8   | 7124.3  | 41.2    | 865.1  | 46.2    | 252.3  | 109.2   | 112.6   |
| <b>DRB1*04:05</b>            | 6.4     | 7.0      | 45.7    | 3410.4  | 7.6    | 60.6    | 3.0    | 430.1   | 3380.6  |
| <b>DRB1*15:01</b>            | 488.6   | 89.3     | 618.8   | 6.7     | 24.8   | 1.9     | 8.6    | 2088.4  | 10099.8 |
| <b>DRB1*04:01</b>            | 55.2    | 304.9    | 44.8    | 316.4   | 25.5   | 2.8     | 2.1    | 133.6   | 42898.2 |
| <b>DRB1*04:04</b>            | 46.3    | 5.5      | 4053.3  | 70.0    | 63.1   | 18.7    | 0.3    | 211.9   | 2114.7  |
| <b>DRB1*01:01</b>            | 6.7     | 112.7    | 19.3    | 76.2    | 39.5   | 34.0    | 2.3    | 115.1   | 5375.4  |
| <b>DRB1*03:01</b>            | 3065.0  | <46728.9 | 4318.5  | 15451.9 | 1452.2 | 17261.8 | 8578.9 | 4551.2  | 27550.6 |
| <b>DRB1*07:01</b>            | 3.0     | 2.5      | 14.4    | 23.3    | 7.1    | 5.1     | 2.4    | 6.4     | 229.9   |
| <b>DRB3*02:02</b>            | 4122.0  | 965.8    | 2035.7  | 453.8   | 226.0  | 60.7    | 28.0   | 116.7   | 5626.2  |
| <b>DRB1*10:01</b>            | 23.8    | 86.7     | 66.8    | 325.3   | 11.7   | 22.2    | 25.0   | 114.6   | 279.6   |
| <b>DRB1*08:02</b>            | 14.0    | 7.8      | 3258.6  | 37.0    | 40.6   | 177.1   | 0.4    | 62.4    | 256.2   |
| <b>DRB4*01:01</b>            | 10257.6 | 5006.6   | 35054.4 | 2711.3  | 313.4  | 1590.0  | 986.0  | 573.5   | 173.4   |

|                              |         |         |          |          |          |         |          |          |          |
|------------------------------|---------|---------|----------|----------|----------|---------|----------|----------|----------|
| <b>DQA1*01:02/DQB1*06:02</b> | 1742.9  | 59.4    | 1758.0   | 0.3      | 756.5    | 64.5    | 7.5      | 518.1    | 8650.7   |
| <b>DQA1*04:01/DQB1*04:02</b> | 8619.72 | 4091.38 | 15618.21 | 33127.11 | 35778.23 | 724.25  | 1036.84  | 1024.81  | 12173.56 |
| <b>DQA1*05:01/DQB1*02:01</b> | 694.88  | 476.71  | 546.93   | 5985.30  | 1204.37  | 64.11   | 42.85    | 395.32   | 744.39   |
| <b>DQA1*01:01/DQB1*05:01</b> | 8067.92 | 712.42  | 1613.80  | 7766.08  | 94.71    | 8.10    | 78.30    | 6664.63  | 59.06    |
| <b>DPA1*03:01/DPB1*04:02</b> | 181.32  | 153.41  | 917.37   | 40.22    | 2933.37  | 5663.50 | 589.74   | 23294.62 | 182.00   |
| <b>DPA1*02:01/DPB1*01:01</b> | 102.90  | 7676.56 | 5742.34  | 4597.98  | 10110.17 | 7784.50 | 69.41    | <46728.9 | 3134.74  |
| <b>DPB1*14:01</b>            | 23.10   | 3481.31 | 31212.58 | 3310.23  | 33759.07 | 60.82   | 11.43    | 569.99   | 749.56   |
| <b>DPA1*01:03/DPB1*04:01</b> | 3.6     | 2146.7  | 680.6    | 29.0     | 615.4    | 393.0   | 41.7     | 21418.5  | 798.7    |
| <b>DRB1*16:02</b>            | 1.01    | 62.22   | 124.24   | 13.92    | 3.11     | 36.59   | 13.48    | 652.26   | 13568.53 |
| <b>DRB1*11:01</b>            | 123.5   | 2920.1  | 139.0    | 110.1    | 1201.2   | 265.1   | 1799.8   | 965.2    | 5246.9   |
| <b>DRB5*01:01</b>            | 591.7   | 2399.5  | 384.6    | 191.9    | 248.4    | 118.8   | 117.8    | 8406.6   | <46728.9 |
| <b>DPA1*02:01/DPB1*05:01</b> | 146.68  | 9531.86 | 1635.65  | 567.24   | 7576.80  | 1164.68 | 19700.38 | 24320.89 | 1172.16  |
| <b>DQA1*05:01/DQB1*03:01</b> | 489.2   | 738.7   | 1646.0   | 128.1    | 9182.3   | 94.3    | 4.2      | 175.7    | 1518.3   |
| <b>DQA1*03:01/DQB1*03:02</b> | 3544.7  | 2387.9  | 3202.2   | 26483.8  | 26160.2  | 197.5   | 183.6    | 792.9    | 10369.1  |
| <b>DRB1*12:01</b>            | 1903.3  | 13009.6 | 3048.7   | 2006.5   | 4198.8   | 4411.2  | 12.9     | 1873.2   | 204.8    |
| <b>DRB1*13:02</b>            | 6.2     | 932.1   | 73.7     | 92.6     | 100.6    | 198.4   | 0.6      | 1.2      | 203.4    |
| <b>DRB1*09:01</b>            | 2.4     | 234.5   | 19.6     | 12.6     | 7.0      | 7.5     | 5.7      | 34.3     | 839.7    |
| <b>DRB3*01:01</b>            | 550.5   | 4755.1  | 312.8    | 3343.1   | 2048.9   | 122.5   | 9036.9   | 5282.5   | 17022.4  |



| Antigen          | Peptide          | Sequence        | Control patients |         |        |         |        |         | SIT patients |         |        |         |        |         |
|------------------|------------------|-----------------|------------------|---------|--------|---------|--------|---------|--------------|---------|--------|---------|--------|---------|
|                  |                  |                 | IFN $\gamma$     |         | IL5    |         | IL10   |         | IFN $\gamma$ |         | IL5    |         | IL10   |         |
|                  |                  |                 | Donors           | Sum SFC | Donors | Sum SFC | Donors | Sum SFC | Donors       | Sum SFC | Donors | Sum SFC | Donors | Sum SFC |
| 1                | 1 <sub>12</sub>  | SDGTFARAAVPSGAS | 0                | 0       | 0      | 0       | 0      | 0       | 1            | 540     | 0      | 0       | 0      | 0       |
|                  | 1 <sub>18</sub>  | RAAVPSGASTGVYEA | 0                | 0       | 0      | 0       | 0      | 0       | 1            | 67      | 0      | 0       | 0      | 0       |
|                  | 1 <sub>24</sub>  | GASTGVYEALERDQ  | 0                | 0       | 0      | 0       | 0      | 0       | 0            | 0       | 0      | 0       | 0      | 0       |
|                  | 1 <sub>43</sub>  | LGKGVKGNRANVEL  | 0                | 0       | 0      | 0       | 0      | 0       | 0            | 0       | 0      | 0       | 0      | 0       |
|                  | 1 <sub>51</sub>  | NRANVELFHIAVLLA | 0                | 0       | 0      | 0       | 0      | 0       | 1            | 30      | 0      | 0       | 0      | 0       |
|                  | 1 <sub>70</sub>  | QTELDNFMVHQLDGT | 0                | 0       | 0      | 0       | 0      | 0       | 0            | 0       | 0      | 0       | 0      | 0       |
|                  | 1 <sub>91</sub>  | CKQKVFVNISADADA | 0                | 0       | 0      | 0       | 0      | 0       | 0            | 0       | 0      | 0       | 0      | 0       |
|                  | 1 <sub>15</sub>  | PAMAATIQSVKARQI | 0                | 0       | 0      | 0       | 0      | 0       | 2            | 197     | 0      | 0       | 0      | 0       |
|                  | 1 <sub>84</sub>  | VDNVNSIIGPALIGK | 0                | 0       | 0      | 0       | 0      | 0       | 0            | 0       | 0      | 0       | 0      | 0       |
|                  | 1 <sub>127</sub> | KLGANAILAVSLAVC | 0                | 0       | 0      | 0       | 0      | 0       | 1            | 67      | 0      | 0       | 0      | 0       |
|                  | 1 <sub>148</sub> | KKIPLYQHIANLAGN | 0                | 0       | 0      | 0       | 0      | 0       | 1            | 27      | 0      | 0       | 0      | 0       |
|                  | 1 <sub>161</sub> | GNKQLVLPVPAFNV  | 1                | 190     | 0      | 0       | 0      | 0       | 1            | 47      | 0      | 0       | 0      | 0       |
|                  | 1 <sub>184</sub> | KLAMQEFMILPTGAS | 0                | 0       | 0      | 0       | 0      | 0       | 1            | 63      | 0      | 0       | 0      | 0       |
|                  | 1 <sub>205</sub> | KMGVEVYHNLKSVIK | 0                | 0       | 0      | 0       | 0      | 0       | 0            | 0       | 0      | 0       | 0      | 0       |
|                  | 1 <sub>260</sub> | GKVVIGMDVAASEFY | 0                | 0       | 0      | 0       | 0      | 0       | 0            | 0       | 0      | 0       | 1      | 23      |
|                  | 1 <sub>304</sub> | VYKSFVSEYPIVSIE | 0                | 0       | 1      | 20      | 0      | 0       | 2            | 107     | 0      | 0       | 0      | 0       |
|                  | 1 <sub>342</sub> | IVGDDLLVTNPTRVA | 1                | 193     | 0      | 0       | 0      | 0       | 2            | 267     | 0      | 0       | 0      | 0       |
|                  | 1 <sub>365</sub> | NALLKVNQIGSVTE  | 1                | 170     | 0      | 0       | 0      | 0       | 0            | 0       | 0      | 0       | 0      | 0       |
|                  | 1 <sub>402</sub> | ETEDTFIADLAVGLS | 0                | 0       | 0      | 0       | 0      | 0       | 1            | 40      | 0      | 0       | 0      | 0       |
|                  | 1 <sub>429</sub> | ERLAKYNQLLRIEEE | 0                | 0       | 0      | 0       | 0      | 0       | 0            | 0       | 0      | 0       | 0      | 0       |
| 1 <sub>444</sub> | LGAAAVYAGLKFRA   | 1               | 153              | 0       | 0      | 0       | 0      | 1       | 43           | 0       | 0      | 0       | 0      |         |
| 2                | 2 <sub>1</sub>   | AEFEGVFLDFARQQA | 0                | 0       | 2      | 137     | 0      | 0       | 0            | 0       | 0      | 0       | 0      | 0       |
|                  | 2 <sub>20</sub>  | VDKLFKLAEEAKLKE | 2                | 610     | 2      | 200     | 0      | 0       | 2            | 133     | 1      | 67      | 0      | 0       |





|                  |                  |   |      |   |      |   |     |   |      |   |     |   |    |
|------------------|------------------|---|------|---|------|---|-----|---|------|---|-----|---|----|
| 5 <sub>159</sub> | DHLRQVFTAQMGLSD  | 0 | 0    | 0 | 0    | 0 | 0   | 0 | 0    | 0 | 0   | 0 | 0  |
| 5 <sub>202</sub> | NPLIFDNSYFTELLT  | 0 | 0    | 0 | 0    | 0 | 0   | 0 | 0    | 0 | 0   | 0 | 0  |
| 5 <sub>248</sub> | EDAFFADYAEHLKL   | 0 | 0    | 0 | 0    | 0 | 0   | 0 | 0    | 0 | 0   | 0 | 0  |
| 6                | 6 <sub>1</sub>   | 1 | 140  | 2 | 63   | 0 | 0   | 2 | 383  | 1 | 70  | 0 | 0  |
|                  | 6 <sub>14</sub>  | 0 | 0    | 0 | 0    | 0 | 0   | 1 | 20   | 0 | 0   | 0 | 0  |
|                  | 6 <sub>44</sub>  | 0 | 0    | 2 | 77   | 0 | 0   | 2 | 93   | 0 | 0   | 0 | 0  |
|                  | 6 <sub>50</sub>  | 0 | 0    | 0 | 0    | 0 | 0   | 0 | 0    | 0 | 0   | 0 | 0  |
|                  | 6 <sub>92</sub>  | 0 | 0    | 1 | 33   | 0 | 0   | 0 | 0    | 0 | 0   | 0 | 0  |
|                  | 6 <sub>123</sub> | 0 | 0    | 2 | 110  | 0 | 0   | 0 | 0    | 0 | 0   | 0 | 0  |
|                  | 6 <sub>131</sub> | 0 | 0    | 1 | 33   | 0 | 0   | 2 | 200  | 0 | 0   | 0 | 0  |
|                  | 6 <sub>142</sub> | 0 | 0    | 1 | 353  | 0 | 0   | 1 | 63   | 0 | 0   | 0 | 0  |
|                  | 6 <sub>149</sub> | 0 | 0    | 1 | 153  | 0 | 0   | 0 | 0    | 0 | 0   | 0 | 0  |
|                  | 6 <sub>165</sub> | 2 | 1967 | 3 | 587  | 1 | 57  | 3 | 583  | 3 | 237 | 0 | 0  |
|                  | 6 <sub>175</sub> | 0 | 0    | 2 | 227  | 0 | 0   | 0 | 0    | 1 | 30  | 0 | 0  |
|                  | 6 <sub>224</sub> | 2 | 130  | 2 | 173  | 0 | 0   | 0 | 0    | 0 | 0   | 0 | 0  |
|                  | 6 <sub>233</sub> | 0 | 0    | 3 | 330  | 0 | 0   | 2 | 787  | 2 | 57  | 0 | 0  |
|                  | 6 <sub>242</sub> | 1 | 30   | 3 | 137  | 0 | 0   | 0 | 0    | 0 | 0   | 0 | 0  |
|                  | 6 <sub>248</sub> | 2 | 320  | 4 | 393  | 0 | 0   | 1 | 507  | 1 | 137 | 0 | 0  |
|                  | 6 <sub>282</sub> | 0 | 0    | 0 | 0    | 0 | 0   | 0 | 0    | 0 | 0   | 0 | 0  |
|                  | 6 <sub>288</sub> | 0 | 0    | 1 | 107  | 2 | 43  | 1 | 43   | 0 | 0   | 0 | 0  |
|                  | 6 <sub>304</sub> | 1 | 393  | 1 | 67   | 0 | 0   | 2 | 177  | 1 | 77  | 0 | 0  |
|                  | 6 <sub>310</sub> | 0 | 0    | 3 | 203  | 0 | 0   | 1 | 90   | 1 | 20  | 0 | 0  |
|                  | 6 <sub>316</sub> | 2 | 1757 | 3 | 1550 | 2 | 527 | 3 | 273  | 2 | 140 | 0 | 0  |
|                  | 6 <sub>325</sub> | 1 | 417  | 2 | 227  | 0 | 0   | 1 | 83   | 0 | 0   | 0 | 0  |
|                  | 6 <sub>348</sub> | 1 | 53   | 3 | 180  | 0 | 0   | 2 | 183  | 0 | 0   | 0 | 0  |
|                  | 6 <sub>359</sub> | 4 | 1377 | 5 | 470  | 1 | 43  | 6 | 1267 | 3 | 320 | 1 | 57 |



|    |                  |                  |   |     |   |     |   |   |     |     |   |     |   |
|----|------------------|------------------|---|-----|---|-----|---|---|-----|-----|---|-----|---|
|    | 8 <sub>313</sub> | KQMDWVSKLSAPQLK  | 0 | 0   | 0 | 0   | 0 | 0 | 0   | 0   | 0 | 0   | 0 |
|    | 8 <sub>382</sub> | KPILFMNEYNTIEEP  | 0 | 0   | 0 | 0   | 0 | 0 | 0   | 0   | 0 | 0   | 0 |
|    | 8 <sub>404</sub> | TKYLAKLKQIQSYPG  | 0 | 0   | 0 | 0   | 0 | 0 | 0   | 0   | 0 | 0   | 0 |
|    | 8 <sub>438</sub> | PYVRGSLDTLAQAKV  | 0 | 0   | 0 | 0   | 0 | 0 | 0   | 0   | 0 | 0   | 0 |
|    | 8 <sub>465</sub> | PKQVEYLEEVMREGF  | 0 | 0   | 0 | 0   | 0 | 0 | 0   | 0   | 0 | 0   | 0 |
|    | 8 <sub>172</sub> | NVTaelVDSMSLQPF  | 1 | 293 | 0 | 0   | 0 | 0 | 0   | 0   | 0 | 0   | 0 |
| 9  | 9 <sub>56</sub>  | TDTIVYCAGRTFFFR  | 1 | 180 | 0 | 0   | 0 | 0 | 0   | 0   | 0 | 0   | 0 |
|    | 9 <sub>64</sub>  | GRTFFFRRLDAPLDA  | 1 | 383 | 0 | 0   | 0 | 1 | 163 | 0   | 0 | 0   | 0 |
|    | 9 <sub>152</sub> | KSLVRAF MWDSGSTV | 0 | 0   | 0 | 0   | 0 | 0 | 0   | 0   | 0 | 0   | 0 |
|    | 9 <sub>175</sub> | RVLSCDFKPTRPFRI  | 2 | 270 | 0 | 0   | 0 | 1 | 60  | 0   | 0 | 0   | 0 |
|    | 9 <sub>260</sub> | HTGSIYAVSWSADSK  | 0 | 0   | 0 | 0   | 0 | 0 | 0   | 0   | 0 | 0   | 0 |
|    | 9 <sub>349</sub> | AGHLKTVSSLTYFPQ  | 0 | 0   | 0 | 0   | 0 | 0 | 0   | 0   | 0 | 0   | 0 |
|    | 9 <sub>355</sub> | VSSLTYFPQSNPRTM  | 0 | 0   | 1 | 23  | 0 | 0 | 0   | 0   | 0 | 0   | 0 |
|    | 9 <sub>373</sub> | SYDGVIIRWIQGVGY  | 0 | 0   | 0 | 0   | 0 | 0 | 0   | 0   | 0 | 0   | 0 |
|    | 9 <sub>397</sub> | TQIKCFVAEEEEELIT | 0 | 0   | 1 | 20  | 0 | 0 | 0   | 0   | 0 | 0   | 0 |
|    | 9 <sub>441</sub> | NALNIAVQQPEFALI  | 0 | 0   | 1 | 60  | 0 | 0 | 1   | 20  | 0 | 0   | 0 |
|    | 9 <sub>450</sub> | PEFALITD SAIVLL  | 0 | 0   | 1 | 33  | 0 | 0 | 1   | 223 | 1 | 667 | 0 |
|    | 9 <sub>457</sub> | TDSAIVLLHKSTVTS  | 0 | 0   | 0 | 0   | 0 | 0 | 1   | 47  | 0 | 0   | 0 |
|    | 9 <sub>473</sub> | TKVSYTITSSAVSPD  | 0 | 0   | 0 | 0   | 0 | 0 | 0   | 0   | 0 | 0   | 0 |
|    | 9 <sub>499</sub> | KLRIYSISGDTLTEE  | 1 | 53  | 0 | 0   | 0 | 0 | 0   | 0   | 0 | 0   | 0 |
|    | 9 <sub>526</sub> | IHYPDVSMFASADA   | 1 | 77  | 2 | 47  | 0 | 0 | 1   | 50  | 1 | 23  | 0 |
|    | 9 <sub>554</sub> | IKLKNMLFHTARINC  | 1 | 20  | 1 | 33  | 0 | 0 | 1   | 47  | 0 | 0   | 0 |
| 10 | 10 <sub>10</sub> | GRYFSKDAVQIITKM  | 1 | 170 | 1 | 43  | 0 | 0 | 1   | 40  | 0 | 0   | 0 |
|    | 10 <sub>16</sub> | DAVQIITKMAAANGV  | 1 | 83  | 1 | 160 | 0 | 0 | 0   | 0   | 0 | 0   | 0 |
|    | 10 <sub>29</sub> | GVRRVWVGQDSSLST  | 2 | 60  | 0 | 0   | 0 | 0 | 1   | 237 | 0 | 0   | 0 |
|    | 10 <sub>39</sub> | SLLSTPAVSAIIRER  | 2 | 60  | 1 | 37  | 0 | 0 | 1   | 173 | 1 | 33  | 0 |

|    |                   |                  |   |     |   |     |   |   |   |     |   |    |   |   |
|----|-------------------|------------------|---|-----|---|-----|---|---|---|-----|---|----|---|---|
|    | 10 <sub>45</sub>  | AVSAIRERIAADGS   | 1 | 47  | 1 | 60  | 0 | 0 | 1 | 27  | 0 | 0  | 0 | 0 |
| 11 | 11 <sub>58</sub>  | SVGFVETLENDLAQL  | 1 | 47  | 1 | 30  | 0 | 0 | 1 | 27  | 0 | 0  | 0 | 0 |
|    | 11 <sub>111</sub> | LGEAPYKFKSALEAV  | 2 | 977 | 1 | 110 | 0 | 0 | 0 | 0   | 0 | 0  | 0 | 0 |
|    | 11 <sub>117</sub> | KFKSALEAVKTLRAE  | 0 | 0   | 1 | 43  | 0 | 0 | 0 | 0   | 0 | 0  | 0 | 0 |
|    | 11 <sub>137</sub> | QYLPAFVIVDESGKS  | 0 | 0   | 1 | 23  | 0 | 0 | 0 | 0   | 0 | 0  | 0 | 0 |
|    | 11 <sub>161</sub> | VVTFNFRADRMVMLA  | 0 | 0   | 2 | 100 | 0 | 0 | 0 | 0   | 0 | 0  | 0 | 0 |
|    | 11 <sub>168</sub> | ADRMVMLAKALEFAD  | 0 | 0   | 1 | 40  | 0 | 0 | 0 | 0   | 0 | 0  | 0 | 0 |
|    | 11 <sub>183</sub> | FDKFDRVRVPKIKYA  | 0 | 0   | 0 | 0   | 0 | 0 | 0 | 0   | 0 | 0  | 0 | 0 |
|    | 11 <sub>192</sub> | PKIKYAGMLQYDGEL  | 0 | 0   | 0 | 0   | 0 | 0 | 1 | 47  | 0 | 0  | 0 | 0 |
|    | 11 <sub>206</sub> | LKLPNKFLVSPPLIE  | 0 | 0   | 1 | 30  | 0 | 0 | 1 | 43  | 0 | 0  | 0 | 0 |
| 12 | 12 <sub>5</sub>   | YKLLCSSFPVITYHQ  | 0 | 0   | 2 | 120 | 0 | 0 | 1 | 203 | 1 | 37 | 0 | 0 |
|    | 12 <sub>12</sub>  | FPVITYHQGRNGNLS  | 0 | 0   | 1 | 103 | 0 | 0 | 0 | 0   | 0 | 0  | 0 | 0 |
|    | 12 <sub>21</sub>  | RNGNLSALACPLNQK  | 0 | 0   | 1 | 20  | 0 | 0 | 1 | 20  | 0 | 0  | 0 | 0 |
| 13 | 13 <sub>21</sub>  | ECILSGLLSVDGLKV  | 0 | 0   | 0 | 0   | 0 | 0 | 0 | 0   | 0 | 0  | 0 | 0 |
|    | 13 <sub>27</sub>  | LLSVDGLKVLHMDRN  | 0 | 0   | 0 | 0   | 0 | 0 | 0 | 0   | 0 | 0  | 0 | 0 |
|    | 13 <sub>81</sub>  | VPKFMANGALVRVL   | 0 | 0   | 0 | 0   | 0 | 0 | 0 | 0   | 1 | 37 | 0 | 0 |
|    | 13 <sub>92</sub>  | VRVLIRTSVTKYLNLF | 0 | 0   | 0 | 0   | 0 | 0 | 0 | 0   | 0 | 0  | 0 | 0 |
|    | 13 <sub>101</sub> | TKYLNFKAVDGSFVY  | 0 | 0   | 0 | 0   | 0 | 0 | 0 | 0   | 1 | 50 | 0 | 0 |
|    | 13 <sub>126</sub> | TDVEALKSNLMGLFE  | 0 | 0   | 0 | 0   | 0 | 0 | 0 | 0   | 0 | 0  | 0 | 0 |
|    | 13 <sub>140</sub> | EKRRARKFFIYVQDY  | 0 | 0   | 0 | 0   | 0 | 0 | 0 | 0   | 0 | 0  | 0 | 0 |
|    | 13 <sub>146</sub> | KFFIYVQDYEEEDPK  | 0 | 0   | 0 | 0   | 0 | 0 | 1 | 33  | 0 | 0  | 0 | 0 |
|    | 13 <sub>185</sub> | TVDFIGHALALHRDD  | 0 | 0   | 0 | 0   | 0 | 0 | 0 | 0   | 0 | 0  | 0 | 0 |
|    | 13 <sub>210</sub> | VKRMKLYAESLARFQ  | 0 | 0   | 0 | 0   | 0 | 0 | 1 | 57  | 0 | 0  | 0 | 0 |
|    | 13 <sub>237</sub> | GELPQAFARLSAVYG  | 0 | 0   | 0 | 0   | 0 | 0 | 0 | 0   | 0 | 0  | 0 | 0 |
|    | 13 <sub>243</sub> | FARLSAVYGGTYMLN  | 0 | 0   | 0 | 0   | 0 | 0 | 0 | 0   | 0 | 0  | 0 | 0 |
|    | 13 <sub>352</sub> | KGKFIAFVSTEAETD  | 0 | 0   | 0 | 0   | 0 | 0 | 1 | 153 | 0 | 0  | 0 | 0 |





|    |                   |                  |   |     |   |     |   |   |      |    |   |   |   |
|----|-------------------|------------------|---|-----|---|-----|---|---|------|----|---|---|---|
|    | 20 <sub>55</sub>  | RGYAAAAAPSPAVF   | 0 | 0   | 0 | 0   | 0 | 0 | 0    | 0  | 0 | 0 | 0 |
|    | 20 <sub>114</sub> | LGLPVFNSVAEAKAE  | 0 | 0   | 0 | 0   | 0 | 0 | 0    | 0  | 0 | 0 | 0 |
|    | 20 <sub>129</sub> | TKANASVIYVPPFA   | 0 | 0   | 0 | 0   | 0 | 0 | 0    | 0  | 0 | 0 | 0 |
|    | 20 <sub>135</sub> | VIYVPPFAAAAIME   | 0 | 0   | 0 | 0   | 0 | 0 | 0    | 0  | 0 | 0 | 0 |
|    | 20 <sub>141</sub> | PFAAAAIMEALEAEL  | 0 | 0   | 0 | 0   | 0 | 0 | 0    | 0  | 0 | 0 | 0 |
|    | 20 <sub>167</sub> | QHDMVKVKAALNRQS  | 0 | 0   | 0 | 0   | 0 | 1 | 1003 | 0  | 0 | 0 | 0 |
|    | 20 <sub>222</sub> | TLTYEAVFQTTAVGL  | 0 | 0   | 0 | 0   | 0 | 0 | 0    | 0  | 0 | 0 | 0 |
|    | 20 <sub>294</sub> | DKPVVAFIAGLTAPP  | 0 | 0   | 1 | 23  | 0 | 0 | 0    | 0  | 0 | 0 | 0 |
|    | 20 <sub>329</sub> | KIKALREAGVTVVES  | 0 | 0   | 1 | 23  | 0 | 0 | 0    | 0  | 0 | 0 | 0 |
|    | 20 <sub>348</sub> | GSTMFEIFKQRMVE   | 0 | 0   | 0 | 0   | 0 | 0 | 0    | 0  | 0 | 0 | 0 |
| 21 | 21 <sub>2</sub>   | GSGDFKTIKALAKV   | 0 | 0   | 0 | 0   | 0 | 0 | 0    | 0  | 0 | 0 | 0 |
|    | 21 <sub>23</sub>  | MYVMYIKEGTYKEYV  | 0 | 0   | 0 | 0   | 0 | 0 | 0    | 0  | 0 | 0 | 0 |
|    | 21 <sub>33</sub>  | YKEYVTVPRVTNLV   | 0 | 0   | 0 | 0   | 0 | 1 | 1020 | 0  | 0 | 0 | 0 |
|    | 21 <sub>43</sub>  | VTNLVMIGDGAAKTI  | 0 | 0   | 0 | 0   | 0 | 0 | 0    | 0  | 0 | 0 | 0 |
|    | 21 <sub>63</sub>  | NFKMNLMSMVAVSLV  | 0 | 0   | 0 | 0   | 0 | 0 | 0    | 0  | 0 | 0 | 0 |
|    | 21 <sub>109</sub> | YQDTLYTHAQRQFFR  | 0 | 0   | 0 | 0   | 0 | 0 | 0    | 0  | 0 | 0 | 0 |
|    | 21 <sub>129</sub> | GTIDFIFGNSQVVIQ  | 0 | 0   | 0 | 0   | 0 | 0 | 0    | 0  | 0 | 0 | 0 |
|    | 21 <sub>53</sub>  | AKTIILKFLLPVMIV  | 0 | 0   | 0 | 0   | 0 | 0 | 0    | 0  | 0 | 0 | 0 |
| 22 | 22 <sub>15</sub>  | NTRVLLRRRTSPFSA  | 0 | 0   | 1 | 63  | 0 | 0 | 0    | 0  | 0 | 0 | 0 |
|    | 22 <sub>124</sub> | DGYIYHGQCAIIMFD  | 0 | 0   | 1 | 80  | 0 | 0 | 0    | 0  | 0 | 0 | 0 |
|    | 22 <sub>131</sub> | QCAIIMFDVTSRLTY  | 0 | 0   | 1 | 27  | 0 | 0 | 0    | 0  | 0 | 0 | 0 |
|    | 22 <sub>187</sub> | RKKNLQYYEISAKSN  | 0 | 0   | 0 | 0   | 0 | 0 | 0    | 0  | 0 | 0 | 0 |
|    | 22 <sub>197</sub> | SAKSNYNFEKPFLLYL | 0 | 0   | 0 | 0   | 0 | 1 | 47   | 0  | 0 | 0 | 0 |
|    | 22 <sub>206</sub> | KPFLYLARKLAGDAN  | 1 | 603 | 2 | 177 | 0 | 0 | 0    | 0  | 0 | 0 | 0 |
|    | 22 <sub>219</sub> | ANIHFVEAVALKPPE  | 1 | 63  | 0 | 0   | 0 | 0 | 0    | 0  | 0 | 0 | 0 |
|    | 22 <sub>245</sub> | EAELAAAAQPLPDD   | 0 | 0   | 1 | 20  | 0 | 0 | 1    | 57 | 0 | 0 | 0 |

|    |                   |                  |   |     |   |     |   |   |   |      |   |     |   |   |
|----|-------------------|------------------|---|-----|---|-----|---|---|---|------|---|-----|---|---|
| 23 | 23 <sub>1</sub>   | RTSSWGSGLKIDR    | 0 | 0   | 2 | 67  | 0 | 0 | 0 | 0    | 0 | 0   | 0 | 0 |
|    | 23 <sub>10</sub>  | SLKIDRRELVTRIY   | 0 | 0   | 0 | 0   | 0 | 0 | 0 | 0    | 0 | 0   | 0 | 0 |
| 24 | 24 <sub>21</sub>  | RFLHAAVAMATKRSV  | 1 | 150 | 0 | 0   | 0 | 0 | 0 | 0    | 0 | 0   | 0 | 0 |
|    | 24 <sub>44</sub>  | KGKKVFLRADLNVP   | 3 | 703 | 2 | 60  | 0 | 0 | 4 | 180  | 0 | 0   | 0 | 0 |
|    | 24 <sub>68</sub>  | TRIRASIPTIKFLE   | 1 | 140 | 0 | 0   | 0 | 0 | 1 | 210  | 0 | 0   | 0 | 0 |
|    | 24 <sub>76</sub>  | TIKFLLEKGAHVILA  | 0 | 0   | 2 | 93  | 0 | 0 | 1 | 83   | 1 | 33  | 0 | 0 |
|    | 24 <sub>82</sub>  | EKGAKVILASHLGRP  | 0 | 0   | 1 | 63  | 0 | 0 | 0 | 0    | 0 | 0   | 0 | 0 |
|    | 24 <sub>109</sub> | VPRLSELLGVEVMA   | 2 | 237 | 2 | 140 | 0 | 0 | 3 | 333  | 0 | 0   | 0 | 0 |
|    | 24 <sub>141</sub> | GGVLLLENVRFYKEE  | 1 | 33  | 2 | 97  | 0 | 0 | 2 | 87   | 0 | 0   | 0 | 0 |
|    | 24 <sub>160</sub> | PEFAKKLASVADLYV  | 0 | 0   | 2 | 90  | 0 | 0 | 0 | 0    | 0 | 0   | 0 | 0 |
|    | 24 <sub>193</sub> | KFLRPSVAGFLMQKE  | 1 | 177 | 3 | 113 | 0 | 0 | 1 | 37   | 0 | 0   | 0 | 0 |
|    | 24 <sub>199</sub> | VAGFLMQKELDYLVG  | 0 | 0   | 1 | 90  | 0 | 0 | 0 | 0    | 0 | 0   | 0 | 0 |
|    | 24 <sub>206</sub> | KELDYLVGAVANPKK  | 1 | 160 | 1 | 47  | 0 | 0 | 2 | 843  | 1 | 107 | 0 | 0 |
|    | 24 <sub>234</sub> | KIGVIESLLAKVDIL  | 0 | 0   | 1 | 57  | 0 | 0 | 0 | 0    | 0 | 0   | 0 | 0 |
|    | 24 <sub>253</sub> | GMIFTFYKAQKAVG   | 2 | 793 | 2 | 277 | 0 | 0 | 6 | 1493 | 2 | 463 | 0 | 0 |
|    | 24 <sub>272</sub> | EEDKLELATSLETA   | 1 | 50  | 2 | 110 | 0 | 0 | 1 | 20   | 0 | 0   | 0 | 0 |
|    | 24 <sub>290</sub> | GVLLLLPTDVVVADK  | 0 | 0   | 1 | 90  | 0 | 0 | 1 | 20   | 0 | 0   | 0 | 0 |
| 25 | 25 <sub>2</sub>   | SAPALRILRSFSPHS  | 1 | 143 | 1 | 100 | 0 | 0 | 1 | 27   | 0 | 0   | 0 | 0 |
| 26 | 26 <sub>2</sub>   | VELVAVNDPFITTDY  | 0 | 0   | 0 | 0   | 0 | 0 | 0 | 0    | 0 | 0   | 0 | 0 |
|    | 26 <sub>15</sub>  | DYMTYMFKYDTHVHGQ | 0 | 0   | 0 | 0   | 0 | 0 | 0 | 0    | 0 | 0   | 0 | 0 |
|    | 26 <sub>90</sub>  | GGAKKVIISAPSKDA  | 0 | 0   | 0 | 0   | 0 | 0 | 0 | 0    | 0 | 0   | 0 | 0 |
|    | 26 <sub>116</sub> | YTSBITIVSNASCTT  | 0 | 0   | 0 | 0   | 0 | 0 | 0 | 0    | 0 | 0   | 0 | 0 |
|    | 26 <sub>138</sub> | KVINDRFGIVEGLMT  | 1 | 37  | 0 | 0   | 0 | 0 | 1 | 87   | 0 | 0   | 0 | 0 |
|    | 26 <sub>144</sub> | FGIVEGLMTTVHAMT  | 0 | 0   | 0 | 0   | 0 | 0 | 1 | 33   | 0 | 0   | 0 | 0 |
|    | 26 <sub>174</sub> | GGRAASFNIIPSTG   | 0 | 0   | 0 | 0   | 0 | 0 | 0 | 0    | 0 | 0   | 0 | 0 |
|    | 26 <sub>221</sub> | LTVRLEKAATYEQIK  | 0 | 0   | 0 | 0   | 0 | 0 | 1 | 47   | 0 | 0   | 0 | 0 |





|    |                   |                 |   |    |   |    |   |   |   |     |   |    |   |   |
|----|-------------------|-----------------|---|----|---|----|---|---|---|-----|---|----|---|---|
|    | 30 <sub>527</sub> | IRKISANIAAKVAAK | 0 | 0  | 0 | 0  | 0 | 0 | 1 | 37  | 0 | 0  | 0 | 0 |
| 31 | 31 <sub>6</sub>   | QIIRKGFYLTKNVEH | 0 | 0  | 0 | 0  | 0 | 0 | 0 | 0   | 0 | 0  | 0 | 0 |
|    | 31 <sub>12</sub>  | FYLTKNVEHKGQVDL | 0 | 0  | 0 | 0  | 0 | 0 | 0 | 0   | 0 | 0  | 0 | 0 |
|    | 31 <sub>18</sub>  | VEHKGQVDLVTETDK | 0 | 0  | 0 | 0  | 0 | 0 | 0 | 0   | 0 | 0  | 0 | 0 |
|    | 31 <sub>30</sub>  | TDKACEDLIFNHLRK | 0 | 0  | 0 | 0  | 0 | 0 | 0 | 0   | 0 | 0  | 0 | 0 |
|    | 31 <sub>36</sub>  | DLIFNHLRKLYPDHK | 0 | 0  | 0 | 0  | 0 | 0 | 1 | 20  | 0 | 0  | 0 | 0 |
| 32 | 32 <sub>41</sub>  | IEIDSLFEGIDFYST | 1 | 27 | 0 | 0  | 0 | 0 | 0 | 0   | 0 | 0  | 0 | 0 |
|    | 32 <sub>50</sub>  | IDFYSTITRARFEEL | 0 | 0  | 1 | 20 | 0 | 0 | 0 | 0   | 0 | 0  | 0 | 0 |
|    | 32 <sub>102</sub> | IPKVQQLQDFFNKG  | 0 | 0  | 0 | 0  | 0 | 0 | 0 | 0   | 0 | 0  | 0 | 0 |
|    | 32 <sub>126</sub> | EAVAYGAAVQAAILS | 1 | 30 | 0 | 0  | 0 | 0 | 0 | 0   | 0 | 0  | 0 | 0 |
|    | 32 <sub>147</sub> | VQDLLLDVTPSLG   | 1 | 47 | 0 | 0  | 0 | 0 | 0 | 0   | 0 | 0  | 0 | 0 |
| 33 | 33 <sub>1</sub>   | QEMAYWSLKAIEIG  | 0 | 0  | 0 | 0  | 0 | 0 | 0 | 0   | 0 | 0  | 0 | 0 |
|    | 33 <sub>20</sub>  | DAASSLYFGENLPR  | 0 | 0  | 0 | 0  | 0 | 0 | 0 | 0   | 0 | 0  | 0 | 0 |
|    | 33 <sub>60</sub>  | GYNISLASMIPDYDT | 0 | 0  | 0 | 0  | 0 | 0 | 0 | 0   | 0 | 0  | 0 | 0 |
|    | 33 <sub>72</sub>  | YDTVITNVRRLAVA  | 0 | 0  | 0 | 0  | 0 | 0 | 0 | 0   | 0 | 0  | 0 | 0 |
|    | 33 <sub>116</sub> | LEKIVAILSFAVDAA | 0 | 0  | 0 | 0  | 0 | 0 | 0 | 0   | 0 | 0  | 0 | 0 |
|    | 33 <sub>7</sub>   | NVRRSLAVAKKNHLA | 0 | 0  | 0 | 0  | 0 | 0 | 0 | 0   | 0 | 0  | 0 | 0 |
|    | 33 <sub>14</sub>  | VAKKNHLAWNCERCR | 0 | 0  | 0 | 0  | 0 | 0 | 0 | 0   | 0 | 0  | 0 | 0 |
|    | 33 <sub>20</sub>  | LAWNCERCRKGESKK | 0 | 0  | 0 | 0  | 0 | 0 | 0 | 0   | 0 | 0  | 0 | 0 |
|    | 33 <sub>33</sub>  | KKTVDAILSFAVDAA | 0 | 0  | 0 | 0  | 0 | 0 | 0 | 0   | 0 | 0  | 0 | 0 |
| 34 | 34 <sub>1</sub>   | LMSFSWICACVRAAA | 0 | 0  | 0 | 0  | 0 | 0 | 0 | 0   | 0 | 0  | 0 | 0 |
|    | 34 <sub>7</sub>   | ICACVRAAAVAWEAG | 0 | 0  | 0 | 0  | 0 | 0 | 0 | 0   | 0 | 0  | 0 | 0 |
|    | 34 <sub>39</sub>  | VRVKILFTALCHTDV | 0 | 0  | 0 | 0  | 0 | 0 | 2 | 303 | 1 | 90 | 0 | 0 |
|    | 34 <sub>114</sub> | MCDLLRINTDRGVMI | 0 | 0  | 0 | 0  | 0 | 0 | 1 | 37  | 1 | 77 | 0 | 0 |
|    | 34 <sub>140</sub> | KPIHFVGTSTFSEY  | 0 | 0  | 1 | 40 | 0 | 0 | 0 | 0   | 0 | 0  | 0 | 0 |
|    | 34 <sub>146</sub> | VGTSTFSEYTMHVHG | 0 | 0  | 0 | 0  | 0 | 0 | 2 | 57  | 0 | 0  | 0 | 0 |

|    |                   |                 |   |     |   |    |   |   |   |     |   |     |   |   |
|----|-------------------|-----------------|---|-----|---|----|---|---|---|-----|---|-----|---|---|
|    | 34 <sub>200</sub> | VAIFGLGAVGLAAAE | 0 | 0   | 0 | 0  | 0 | 0 | 2 | 297 | 0 | 0   | 0 | 0 |
|    | 34 <sub>206</sub> | GAVGLAAAEGARIAG | 0 | 0   | 0 | 0  | 0 | 0 | 1 | 33  | 0 | 0   | 0 | 0 |
|    | 34 <sub>275</sub> | GNINAMIQAFECVHD | 0 | 0   | 0 | 0  | 0 | 0 | 1 | 40  | 0 | 0   | 0 | 0 |
|    | 34 <sub>319</sub> | LKGTFFGNFKPRTDL | 0 | 0   | 0 | 0  | 0 | 0 | 0 | 0   | 0 | 0   | 0 | 0 |
|    | 34 <sub>349</sub> | KFITHSVTFSEINKA | 1 | 110 | 1 | 87 | 0 | 0 | 0 | 0   | 0 | 0   | 0 | 0 |
|    | 34 <sub>355</sub> | VTFSEINKAFDLMAK | 1 | 103 | 0 | 0  | 0 | 0 | 0 | 0   | 0 | 0   | 0 | 0 |
| 35 | 35 <sub>1</sub>   | ALRWNLQMGHSLPK  | 0 | 0   | 1 | 47 | 0 | 0 | 0 | 0   | 0 | 0   | 0 | 0 |
|    | 35 <sub>25</sub>  | NLDVYDWSIPDDLLA | 1 | 67  | 1 | 90 | 0 | 0 | 0 | 0   | 0 | 0   | 0 | 0 |
|    | 35 <sub>35</sub>  | DDLAKFSEIKQTRL  | 0 | 0   | 1 | 30 | 0 | 0 | 0 | 0   | 0 | 0   | 0 | 0 |
|    | 35 <sub>41</sub>  | FSEIKQTRLLMGFI  | 0 | 0   | 0 | 0  | 0 | 0 | 2 | 207 | 0 | 0   | 0 | 0 |
|    | 35 <sub>47</sub>  | TRLLMGNFIVNKDSV | 0 | 0   | 0 | 0  | 0 | 0 | 0 | 0   | 1 | 7   | 0 | 0 |
| 36 | 36 <sub>1</sub>   | QDFKKVNEIYAKYFP | 0 | 0   | 0 | 0  | 0 | 0 | 0 | 0   | 1 | 107 | 0 | 0 |
|    | 36 <sub>7</sub>   | NEIYAKYFPSPAPAR | 0 | 0   | 0 | 0  | 0 | 0 | 0 | 0   | 0 | 0   | 0 | 0 |
|    | 36 <sub>13</sub>  | YFPSPAPARSTYQVA | 0 | 0   | 0 | 0  | 0 | 0 | 0 | 0   | 0 | 0   | 0 | 0 |
|    | 36 <sub>20</sub>  | ARSTYQVAALPLDAR | 0 | 0   | 0 | 0  | 0 | 0 | 0 | 0   | 0 | 0   | 0 | 0 |
|    | 36 <sub>29</sub>  | LPLDARIEICIAAL  | 0 | 0   | 0 | 0  | 0 | 0 | 0 | 0   | 0 | 0   | 0 | 0 |
| 37 | 37 <sub>5</sub>   | EEAASTLPLGSSSTL | 0 | 0   | 0 | 0  | 0 | 0 | 0 | 0   | 0 | 0   | 0 | 0 |
| 38 | 38 <sub>3</sub>   | STKIFLESSTMESRA | 0 | 0   | 0 | 0  | 0 | 0 | 1 | 160 | 0 | 0   | 0 | 0 |
|    | 38 <sub>53</sub>  | CAAVLAASAVVVLVV | 0 | 0   | 0 | 0  | 0 | 0 | 1 | 47  | 0 | 0   | 0 | 0 |
|    | 38 <sub>62</sub>  | VVVLVVASGLAGSRV | 0 | 0   | 0 | 0  | 0 | 0 | 0 | 0   | 0 | 0   | 0 | 0 |
|    | 38 <sub>71</sub>  | LAGSRVVRVAVDVAT | 0 | 0   | 0 | 0  | 0 | 0 | 0 | 0   | 0 | 0   | 0 | 0 |
|    | 38 <sub>159</sub> | GWYHLFYQYNPEGAV | 0 | 0   | 0 | 0  | 0 | 0 | 0 | 0   | 0 | 0   | 0 | 0 |
|    | 38 <sub>184</sub> | SRDLIHWRLPLAMV  | 0 | 0   | 0 | 0  | 0 | 0 | 0 | 0   | 0 | 0   | 0 | 0 |
|    | 38 <sub>221</sub> | LNMLYTGSTNASVQV | 0 | 0   | 0 | 0  | 0 | 0 | 0 | 0   | 0 | 0   | 0 | 0 |
|    | 38 <sub>302</sub> | IAMVYKTKDFVSYEL | 0 | 0   | 0 | 0  | 0 | 0 | 1 | 143 | 0 | 0   | 0 | 0 |
|    | 38 <sub>308</sub> | TKDFVSYELIPGLLH | 0 | 0   | 0 | 0  | 0 | 0 | 2 | 630 | 1 | 63  | 0 | 0 |



























|    |                   |                 |   |     |   |     |   |   |   |     |   |     |   |
|----|-------------------|-----------------|---|-----|---|-----|---|---|---|-----|---|-----|---|
|    | 76 <sub>33</sub>  | KDKLVVSTSCSLMHT | 0 | 0   | 0 | 0   | 0 | 0 | 0 | 0   | 0 | 0   | 0 |
|    | 76 <sub>40</sub>  | TSCSLMHTAVDLVNE | 0 | 0   | 1 | 160 | 0 | 0 | 0 | 0   | 0 | 0   | 0 |
|    | 76 <sub>55</sub>  | TKLDSEIKSWLAFAA | 1 | 323 | 1 | 200 | 0 | 0 | 1 | 43  | 0 | 0   | 0 |
|    | 76 <sub>61</sub>  | IKSWLAFAAQKVVEV | 0 | 0   | 0 | 0   | 0 | 0 | 0 | 0   | 1 | 50  | 0 |
|    | 76 <sub>71</sub>  | KVVEVNALGKALVGL | 0 | 0   | 0 | 0   | 0 | 0 | 0 | 0   | 0 | 0   | 0 |
|    | 76 <sub>85</sub>  | LKDEAYFAANAAQA  | 1 | 153 | 1 | 203 | 0 | 0 | 0 | 0   | 0 | 0   | 0 |
|    | 76 <sub>175</sub> | EAYVSAIKEEISKVV | 0 | 0   | 0 | 0   | 0 | 0 | 1 | 207 | 1 | 197 | 0 |
|    | 76 <sub>185</sub> | ISKVVKIQEELDIDV | 0 | 0   | 0 | 0   | 0 | 0 | 0 | 0   | 0 | 0   | 0 |
|    | 76 <sub>210</sub> | MVEYFGEQLSGFAFT | 0 | 0   | 0 | 0   | 0 | 0 | 0 | 0   | 0 | 0   | 0 |
|    | 76 <sub>218</sub> | LSGFAFTANGWVQSY | 0 | 0   | 1 | 63  | 0 | 0 | 1 | 20  | 0 | 0   | 0 |
|    | 76 <sub>250</sub> | NPMTVFWSKMAQSMT | 0 | 0   | 2 | 250 | 0 | 0 | 1 | 37  | 0 | 0   | 0 |
| 77 | 77 <sub>3</sub>   | EGPLMLYVSKMIPAS | 0 | 0   | 0 | 0   | 0 | 0 | 0 | 0   | 1 | 23  | 0 |
|    | 77 <sub>19</sub>  | KGRFFAFGRVFAGRV | 0 | 0   | 0 | 0   | 0 | 0 | 1 | 237 | 1 | 77  | 0 |
|    | 77 <sub>79</sub>  | GNTVALVGLDQFITK | 0 | 0   | 0 | 0   | 0 | 0 | 0 | 0   | 1 | 97  | 0 |
|    | 77 <sub>85</sub>  | VGLDQFITKNATLTG | 0 | 0   | 0 | 0   | 0 | 0 | 0 | 0   | 0 | 0   | 0 |
|    | 77 <sub>107</sub> | PIRAMKFSVSPVVRV | 0 | 0   | 0 | 0   | 0 | 0 | 0 | 0   | 0 | 0   | 0 |
|    | 77 <sub>179</sub> | FMGGAEIIVSPPVVS | 0 | 0   | 0 | 0   | 0 | 0 | 0 | 0   | 0 | 0   | 0 |
|    | 77 <sub>188</sub> | SPPVVSFRETVLDKS | 0 | 0   | 1 | 107 | 0 | 0 | 0 | 0   | 0 | 0   | 0 |
|    | 77 <sub>212</sub> | NKHNRLYMEARPLEE | 0 | 0   | 1 | 107 | 0 | 0 | 0 | 0   | 0 | 0   | 0 |
|    | 77 <sub>338</sub> | PTARRVIFASQLTAK | 0 | 0   | 0 | 0   | 0 | 0 | 1 | 117 | 1 | 37  | 0 |
|    | 77 <sub>351</sub> | AKPRLLEPVYLVEIQ | 0 | 0   | 0 | 0   | 0 | 0 | 0 | 0   | 0 | 0   | 0 |
|    | 77 <sub>357</sub> | EPVYLVEIQAPEGAL | 0 | 0   | 0 | 0   | 0 | 0 | 0 | 0   | 0 | 0   | 0 |
|    | 77 <sub>395</sub> | PLYNIKAYLPVIESF | 0 | 0   | 0 | 0   | 0 | 0 | 0 | 0   | 0 | 0   | 0 |
|    | 77 <sub>403</sub> | LPVIESFGFSATLRA | 1 | 333 | 0 | 0   | 0 | 0 | 0 | 0   | 0 | 0   | 0 |
|    | 77 <sub>409</sub> | FGFSATLRAATSGQA | 1 | 30  | 0 | 0   | 0 | 0 | 0 | 0   | 0 | 0   | 0 |
| 78 | 78 <sub>5</sub>   | SLKLHKACEAFNPYD | 0 | 0   | 0 | 0   | 0 | 0 | 1 | 87  | 0 | 0   | 0 |



|    |     |                  |                 |    |   |     |    |   |   |     |    |     |   |
|----|-----|------------------|-----------------|----|---|-----|----|---|---|-----|----|-----|---|
| 81 | 24  | FVSFADLNHFPKTFY  | 0               | 0  | 0 | 0   | 0  | 0 | 0 | 0   | 0  | 0   | 0 |
| 81 | 33  | FPKTFYFMATPHASL  | 0               | 0  | 0 | 0   | 0  | 0 | 1 | 63  | 0  | 0   | 0 |
| 81 | 53  | HVKAWWERIMARPAV  | 0               | 0  | 0 | 0   | 0  | 0 | 1 | 53  | 0  | 0   | 0 |
| 81 | 61  | IMARPAVKKIAAAMV  | 0               | 0  | 0 | 0   | 0  | 0 | 0 | 0   | 0  | 0   | 0 |
| 82 | 82  | 33               | KRKVRGFWRVHQISA | 0  | 0 | 0   | 0  | 0 | 0 | 1   | 23 | 0   | 0 |
| 82 | 39  | FWRVHQISARMAPVK  | 0               | 0  | 0 | 0   | 0  | 0 | 5 | 187 | 0  | 0   | 0 |
| 82 | 49  | MAPVKLYGATLSWNV  | 0               | 0  | 0 | 0   | 0  | 0 | 1 | 130 | 1  | 33  | 0 |
| 82 | 109 | GDLYIFESRAICKYA  | 0               | 0  | 1 | 290 | 0  | 0 | 5 | 593 | 3  | 300 | 1 |
| 82 | 150 | EANQYTAALGPILFE  | 0               | 0  | 0 | 0   | 0  | 0 | 2 | 523 | 0  | 0   | 0 |
| 83 | 83  | 5                | ACSLFLNYAVSFNYF | 0  | 0 | 1   | 57 | 0 | 0 | 0   | 0  | 0   | 0 |
| 83 | 12  | YAVSFNYFVCNLLQE  | 1               | 37 | 0 | 0   | 0  | 0 | 0 | 0   | 1  | 23  | 0 |
| 83 | 22  | NLLQERLKKLSEHG   | 1               | 47 | 1 | 83  | 0  | 0 | 0 | 0   | 0  | 0   | 0 |
| 83 | 54  | GMTGMLWETSLDPE   | 0               | 0  | 1 | 107 | 0  | 0 | 0 | 0   | 0  | 0   | 0 |
| 83 | 96  | PEGLLWLLTGKVPT   | 1               | 33 | 1 | 93  | 0  | 0 | 0 | 0   | 0  | 0   | 0 |
| 83 | 130 | YVYKAIDALPVTAHP  | 0               | 0  | 0 | 0   | 0  | 0 | 0 | 0   | 0  | 0   | 0 |
| 83 | 147 | QFTTGVMALQVESEF  | 0               | 0  | 0 | 0   | 0  | 0 | 0 | 0   | 1  | 67  | 0 |
| 83 | 180 | EDCLNLIARLPQVAS  | 0               | 0  | 1 | 137 | 0  | 0 | 1 | 540 | 1  | 117 | 0 |
| 83 | 186 | IARLPQVASVYRRI   | 1               | 33 | 1 | 187 | 0  | 0 | 0 | 0   | 0  | 0   | 0 |
| 83 | 209 | ADNSLDYAANFSHML  | 1               | 53 | 1 | 130 | 0  | 0 | 0 | 0   | 0  | 0   | 0 |
| 83 | 227 | DPKMLELMRLYITIH  | 1               | 40 | 0 | 0   | 0  | 0 | 0 | 0   | 0  | 0   | 0 |
| 83 | 260 | ALSDPYLSFAAALNG  | 1               | 70 | 1 | 130 | 0  | 0 | 0 | 0   | 0  | 0   | 0 |
| 83 | 266 | LSFAAALNGLAGPLH  | 0               | 0  | 1 | 103 | 0  | 0 | 0 | 0   | 0  | 0   | 0 |
| 83 | 278 | PLHGLANQEVLLWIK  | 0               | 0  | 0 | 0   | 0  | 0 | 0 | 0   | 0  | 0   | 0 |
| 83 | 285 | QEVLLWIKSVMEETG  | 0               | 0  | 0 | 0   | 0  | 0 | 0 | 0   | 0  | 0   | 0 |
| 83 | 306 | QLKEYVWVKTLKSGKV | 1               | 40 | 1 | 90  | 0  | 0 | 0 | 0   | 0  | 0   | 0 |
| 83 | 349 | EDPLFQLVSKLYEVV  | 0               | 0  | 1 | 160 | 0  | 0 | 0 | 0   | 0  | 0   | 0 |





|                   |                   |   |      |   |     |   |   |   |     |   |     |   |   |
|-------------------|-------------------|---|------|---|-----|---|---|---|-----|---|-----|---|---|
| 89 <sub>261</sub> | EGKLLRLKQQFFLCS   | 0 | 0    | 0 | 0   | 0 | 0 | 2 | 140 | 0 | 0   | 0 | 0 |
| 89 <sub>267</sub> | LKQQFFLCSASLQDI   | 0 | 0    | 0 | 0   | 0 | 0 | 1 | 40  | 0 | 0   | 0 | 0 |
| 89 <sub>313</sub> | PTLAIPELMRLLMDE   | 0 | 0    | 0 | 0   | 0 | 0 | 1 | 110 | 0 | 0   | 0 | 0 |
| 89 <sub>360</sub> | QSVMRKLLPRQMEII   | 0 | 0    | 0 | 0   | 0 | 0 | 2 | 170 | 0 | 0   | 0 | 0 |
| 89 <sub>375</sub> | EEIDKRFREMVISTR   | 0 | 0    | 0 | 0   | 0 | 0 | 1 | 90  | 1 | 27  | 0 | 0 |
| 89 <sub>406</sub> | PQKPVVRMANLCVVS   | 0 | 0    | 0 | 0   | 0 | 0 | 3 | 270 | 0 | 0   | 0 | 0 |
| 89 <sub>434</sub> | ILKEELFADYVSIWP   | 0 | 0    | 0 | 0   | 0 | 0 | 1 | 40  | 1 | 33  | 0 | 0 |
| 89 <sub>460</sub> | PRRWLRFCNPELSEI   | 1 | 153  | 1 | 240 | 0 | 0 | 1 | 137 | 1 | 23  | 0 | 0 |
| 89 <sub>501</sub> | EKLHAEWAAAKLASK   | 0 | 0    | 0 | 0   | 0 | 0 | 0 | 0   | 0 | 0   | 0 | 0 |
| 89 <sub>540</sub> | IKRIHEYKRLMNIL    | 2 | 90   | 0 | 0   | 0 | 0 | 1 | 110 | 0 | 0   | 0 | 0 |
| 89 <sub>546</sub> | YKRQLMNILGAVYRY   | 1 | 77   | 2 | 187 | 0 | 0 | 2 | 137 | 0 | 0   | 0 | 0 |
| 89 <sub>554</sub> | LGAVYRYKCLKEMSA   | 1 | 63   | 3 | 163 | 0 | 0 | 0 | 0   | 0 | 0   | 0 | 0 |
| 89 <sub>583</sub> | GKAFATYTNAKRIVK   | 0 | 0    | 2 | 137 | 0 | 0 | 0 | 0   | 0 | 0   | 0 | 0 |
| 89 <sub>593</sub> | KRIVKLVNDVGAVVN   | 2 | 413  | 1 | 107 | 0 | 0 | 2 | 357 | 1 | 47  | 0 | 0 |
| 89 <sub>612</sub> | VNKYLKVVFIPIYNNV  | 1 | 220  | 1 | 120 | 0 | 0 | 3 | 290 | 1 | 67  | 0 | 0 |
| 89 <sub>619</sub> | VFIPIYNNVSAEVLII  | 5 | 1413 | 2 | 110 | 0 | 0 | 4 | 537 | 2 | 167 | 0 | 0 |
| 89 <sub>681</sub> | EDNFFLFGAKADQVA   | 1 | 503  | 2 | 97  | 0 | 0 | 1 | 107 | 0 | 0   | 0 | 0 |
| 89 <sub>723</sub> | TFGTDYDTPLLDSLE   | 0 | 0    | 0 | 0   | 0 | 0 | 1 | 150 | 0 | 0   | 0 | 0 |
| 89 <sub>748</sub> | FLVGYDFPSYIDAQA   | 0 | 0    | 0 | 0   | 0 | 0 | 1 | 123 | 0 | 0   | 0 | 0 |
| 89 <sub>772</sub> | KRWIKMSILNTAGSG   | 3 | 407  | 1 | 120 | 0 | 0 | 2 | 537 | 1 | 97  | 0 | 0 |
| 89 <sub>796</sub> | QYAKEIWGITANPVP   | 3 | 303  | 2 | 253 | 0 | 0 | 0 | 0   | 0 | 0   | 0 | 0 |
| 90                | 90 <sub>33</sub>  | 1 | 30   | 0 | 0   | 0 | 0 | 0 | 0   | 0 | 0   | 0 | 0 |
|                   | 90 <sub>45</sub>  | 2 | 60   | 0 | 0   | 0 | 0 | 0 | 0   | 0 | 0   | 0 | 0 |
|                   | 90 <sub>56</sub>  | 1 | 73   | 2 | 73  | 0 | 0 | 0 | 0   | 0 | 0   | 0 | 0 |
|                   | 90 <sub>82</sub>  | 1 | 57   | 0 | 0   | 0 | 0 | 1 | 63  | 0 | 0   | 0 | 0 |
|                   | 90 <sub>103</sub> | 0 | 0    | 0 | 0   | 0 | 0 | 0 | 0   | 1 | 43  | 0 | 0 |

|    |                   |                 |   |     |   |     |   |   |   |     |   |    |   |   |
|----|-------------------|-----------------|---|-----|---|-----|---|---|---|-----|---|----|---|---|
|    | 90 <sub>198</sub> | DPLVTKGANLIPLLG | 1 | 87  | 0 | 0   | 0 | 0 | 1 | 53  | 0 | 0  | 0 | 0 |
|    | 90 <sub>205</sub> | ANLIPLLGIDVWEHA | 1 | 113 | 0 | 0   | 0 | 0 | 1 | 20  | 0 | 0  | 0 | 0 |
|    | 90 <sub>218</sub> | HAYYLQYKNVRPDYL | 2 | 110 | 1 | 83  | 0 | 0 | 0 | 0   | 0 | 0  | 0 | 0 |
|    | 90 <sub>229</sub> | PDYLTIWIKVVNWKY | 1 | 70  | 2 | 110 | 0 | 0 | 0 | 0   | 0 | 0  | 0 | 0 |
| 91 | 91 <sub>35</sub>  | APSGRIVMELYADV  | 2 | 247 | 3 | 737 | 0 | 0 | 0 | 0   | 0 | 0  | 0 | 0 |
|    | 91 <sub>41</sub>  | VMELYADVVPKTAEN | 2 | 140 | 0 | 0   | 0 | 0 | 0 | 0   | 0 | 0  | 0 | 0 |
|    | 91 <sub>74</sub>  | HYKGSSFHRVIPGFM | 1 | 537 | 3 | 623 | 0 | 0 | 0 | 0   | 0 | 0  | 0 | 0 |
|    | 91 <sub>104</sub> | SIYGAKFADENFIKK | 1 | 60  | 0 | 0   | 0 | 0 | 0 | 0   | 1 | 23 | 0 | 0 |
|    | 91 <sub>135</sub> | NGSQFFLCTAKTAWL | 2 | 447 | 1 | 543 | 0 | 0 | 1 | 270 | 0 | 0  | 0 | 0 |
| 92 | 92 <sub>1</sub>   | SQVHIRRPGGAGRDG | 1 | 113 | 0 | 0   | 0 | 0 | 0 | 0   | 0 | 0  | 0 | 0 |
|    | 92 <sub>7</sub>   | RPGGAGRDGGQLRIP | 1 | 130 | 0 | 0   | 0 | 0 | 0 | 0   | 0 | 0  | 0 | 0 |
|    | 92 <sub>13</sub>  | RDGGQLRIPSLHGG  | 1 | 97  | 0 | 0   | 0 | 0 | 0 | 0   | 0 | 0  | 0 | 0 |
|    | 92 <sub>27</sub>  | GHGCAQPAMERRKHI | 2 | 590 | 0 | 0   | 0 | 0 | 0 | 0   | 0 | 0  | 0 | 0 |
|    | 92 <sub>38</sub>  | RKHIEWNCDVCRHGD | 1 | 83  | 0 | 0   | 0 | 0 | 0 | 0   | 0 | 0  | 0 | 0 |
| 93 | 93 <sub>1</sub>   | WTTVMRASCGHHRFR | 1 | 87  | 0 | 0   | 0 | 0 | 0 | 0   | 1 | 43 | 0 | 0 |
|    | 93 <sub>13</sub>  | RFRDCVISSLADFKL | 2 | 93  | 0 | 0   | 0 | 0 | 0 | 0   | 0 | 0  | 0 | 0 |
|    | 93 <sub>19</sub>  | ISSLADFKLFPVLQH | 1 | 67  | 0 | 0   | 0 | 0 | 0 | 0   | 0 | 0  | 0 | 0 |
|    | 93 <sub>29</sub>  | PVLQHIISIAVLAIF | 1 | 140 | 0 | 0   | 0 | 0 | 0 | 0   | 1 | 47 | 0 | 0 |
|    | 93 <sub>35</sub>  | ISIAVLAIFIGLLMI | 2 | 247 | 0 | 0   | 0 | 0 | 0 | 0   | 1 | 37 | 0 | 0 |

\*peptide is 100% identical to a peptide sequence in Phl p 1 and was therefore not included in any pools of interest for subsequent screens, namely the MAA pool and P19.



| Antigen | Control patients |         |              |         |               |     | SIT patients |         |              |         |               |     |
|---------|------------------|---------|--------------|---------|---------------|-----|--------------|---------|--------------|---------|---------------|-----|
|         | IL5              |         | IFN $\gamma$ |         | Ab reactivity |     | IL5          |         | IFN $\gamma$ |         | Ab reactivity |     |
|         | Patients         | Sum SFC | Patients     | Sum SFC | IgE           | IgG | Patients     | Sum SFC | Patients     | Sum SFC | IgE           | IgG |
| 1       | 1                | 20      | 1            | 707     | +             | +   | 0            | 0       | 3            | 1493    | +             | +   |
| 2       | 7                | 3447    | 10           | 8200    | +             | +   | 3            | 130     | 4            | 2790    | +             | +   |
| 3       | 1                | 20      | 0            | 0       | +             | +   | 0            | 0       | 0            | 0       | -             | -   |
| 4       | 3                | 597     | 4            | 923     | -             | -   | 1            | 93      | 2            | 537     | +             | +   |
| 5       | 0                | 0       | 1            | 73      | -             | +   | 0            | 0       | 0            | 0       | +             | +   |
| 6       | 11               | 7003    | 11           | 7490    | +             | +   | 5            | 1087    | 10           | 6163    | +             | +   |
| 7       | 5                | 1657    | 5            | 5603    | +             | +   | 1            | 567     | 3            | 1270    | +             | +   |
| 8       | 0                | 0       | 0            | 293     | +             | -   | 0            | 0       | 0            | 0       | +             | -   |
| 9       | 3                | 217     | 2            | 983     | -             | -   | 2            | 690     | 4            | 610     | +             | +   |
| 10      | 1                | 300     | 2            | 420     | +             | +   | 1            | 33      | 3            | 477     | +             | +   |
| 11      | 3                | 377     | 2            | 1023    | +             | +   | 0            | 0       | 1            | 117     | +             | +   |
| 12      | 2                | 243     | 0            | 0       | -             | +   | 1            | 37      | 2            | 223     | +             | +   |
| 13      | 0                | 0       | 0            | 0       | +             | +   | 2            | 87      | 3            | 373     | +             | +   |
| 14      | 1                | 110     | 0            | 0       | +             | -   | 0            | 0       | 0            | 0       | +             | -   |
| 15      | 0                | 0       | 0            | 0       | +             | -   | 0            | 0       | 0            | 0       | +             | +   |
| 16      | 0                | 0       | 2            | 823     | -             | -   | 0            | 0       | 0            | 0       | -             | -   |
| 17      | 3                | 167     | 0            | 0       | +             | -   | 1            | 20      | 0            | 0       | +             | +   |
| 18      | 0                | 0       | 0            | 0       | -             | -   | 0            | 0       | 1            | 353     | +             | -   |
| 19      | 0                | 0       | 0            | 0       | -             | +   | 0            | 0       | 0            | 0       | +             | +   |
| 20      | 1                | 47      | 0            | 0       | +             | +   | 0            | 0       | 1            | 1003    | +             | -   |
| 21      | 0                | 0       | 0            | 0       | +             | +   | 0            | 0       | 1            | 1020    | -             | +   |
| 22      | 4                | 367     | 1            | 667     | -             | -   | 0            | 0       | 1            | 103     | -             | -   |
| 23      | 2                | 67      | 0            | 0       | -             | -   | 0            | 0       | 0            | 0       | +             | +   |
| 24      | 6                | 1327    | 5            | 2443    | +             | -   | 2            | 603     | 3            | 3307    | +             | +   |
| 25      | 1                | 100     | 1            | 143     | +             | -   | 0            | 0       | 2            | 27      | +             | -   |

|    |   |      |   |      |   |   |   |     |   |      |   |   |
|----|---|------|---|------|---|---|---|-----|---|------|---|---|
| 26 | 0 | 0    | 1 | 37   | - | + | 0 | 0   | 2 | 167  | + | + |
| 27 | 2 | 230  | 2 | 267  | - | - | 0 | 0   | 0 | 0    | + | - |
| 28 | 1 | 540  | 2 | 953  | - | - | 1 | 143 | 1 | 453  | + | + |
| 29 | 2 | 380  | 1 | 247  | + | - | 1 | 20  | 1 | 260  | + | + |
| 30 | 1 | 67   | 0 | 0    | + | + | 0 | 0   | 1 | 37   | + | + |
| 31 | 0 | 0    | 0 | 0    | + | + | 0 | 0   | 1 | 20   | + | + |
| 32 | 1 | 20   | 1 | 103  | + | + | 0 | 0   | 0 | 0    | + | + |
| 33 | 0 | 0    | 0 | 0    | - | + | 0 | 0   | 0 | 0    | - | + |
| 34 | 1 | 127  | 1 | 213  | - | - | 2 | 167 | 3 | 767  | + | + |
| 35 | 1 | 167  | 1 | 67   | - | - | 0 | 0   | 3 | 210  | + | - |
| 36 | 0 | 0    | 0 | 0    | - | - | 1 | 107 | 0 | 0    | - | + |
| 37 | 0 | 0    | 0 | 0    | - | + | 0 | 0   | 0 | 0    | - | + |
| 38 | 0 | 0    | 0 | 0    | - | + | 1 | 63  | 2 | 1430 | - | + |
| 39 | 1 | 67   | 2 | 103  | - | + | 0 | 0   | 2 | 530  | - | + |
| 40 | 1 | 67   | 0 | 0    | - | + | 0 | 0   | 0 | 0    | - | + |
| 41 | 0 | 0    | 0 | 0    | - | + | 0 | 0   | 0 | 0    | - | + |
| 42 | 0 | 0    | 1 | 33   | + | + | 1 | 47  | 2 | 120  | + | + |
| 43 | 1 | 47   | 0 | 0    | - | + | 1 | 80  | 3 | 1337 | - | + |
| 44 | 0 | 0    | 0 | 0    | - | + | 0 | 0   | 0 | 0    | - | + |
| 45 | 0 | 0    | 0 | 0    | - | + | 0 | 0   | 0 | 0    | - | + |
| 46 | 5 | 533  | 2 | 227  | + | + | 0 | 0   | 3 | 100  | + | + |
| 47 | 2 | 210  | 0 | 0    | + | + | 0 | 0   | 1 | 57   | + | + |
| 48 | 0 | 0    | 1 | 297  | - | + | 0 | 0   | 1 | 400  | - | + |
| 49 | 5 | 7417 | 1 | 990  | - | - | 0 | 0   | 0 | 0    | - | + |
| 50 | 1 | 120  | 3 | 957  | - | + | 0 | 0   | 1 | 57   | - | + |
| 51 | 1 | 27   | 1 | 90   | + | + | 0 | 0   | 0 | 0    | + | + |
| 52 | 6 | 930  | 5 | 1293 | - | + | 0 | 0   | 1 | 27   | - | + |
| 53 | 6 | 1750 | 6 | 3693 | - | + | 1 | 30  | 3 | 903  | - | + |
| 54 | 4 | 2647 | 7 | 1133 | - | - | 2 | 387 | 3 | 1510 | - | + |
| 55 | 0 | 0    | 2 | 1070 | - | + | 0 | 0   | 0 | 0    | - | + |

|    |   |      |   |      |      |      |   |      |   |      |      |      |
|----|---|------|---|------|------|------|---|------|---|------|------|------|
| 56 | 0 | 0    | 1 | 343  | -    | -    | 0 | 0    | 0 | 0    | -    | +    |
| 57 | 0 | 0    | 0 | 0    | +    | -    | 0 | 0    | 1 | 480  | +    | -    |
| 58 | 0 | 0    | 0 | 0    | -    | +    | 0 | 0    | 0 | 0    | -    | +    |
| 59 | 2 | 67   | 3 | 620  | +    | -    | 0 | 0    | 0 | 0    | -    | +    |
| 60 | 0 | 0    | 0 | 0    | -    | -    | 0 | 0    | 0 | 0    | -    | +    |
| 61 | 0 | 0    | 0 | 0    | -    | +    | 1 | 137  | 1 | 27   | -    | +    |
| 62 | 5 | 1927 | 6 | 2827 | +    | +    | 2 | 80   | 3 | 1417 | +    | +    |
| 63 | 0 | 0    | 1 | 70   | -    | +    | 0 | 0    | 1 | 190  | -    | +    |
| 64 | 2 | 283  | 1 | 47   | +    | -    | 0 | 0    | 0 | 0    | +    | -    |
| 65 | 1 | 240  | 1 | 527  | +    | +    | 0 | 0    | 1 | 267  | -    | +    |
| 66 | 0 | 0    | 0 | 0    | n.d. | n.d. | 0 | 0    | 0 | 0    | n.d. | n.d. |
| 67 | 0 | 0    | 0 | 0    | n.d. | n.d. | 0 | 0    | 0 | 0    | n.d. | n.d. |
| 68 | 0 | 0    | 0 | 0    | n.d. | n.d. | 0 | 0    | 0 | 0    | n.d. | n.d. |
| 69 | 0 | 0    | 0 | 0    | n.d. | n.d. | 0 | 0    | 0 | 0    | n.d. | n.d. |
| 70 | 0 | 0    | 0 | 0    | n.d. | n.d. | 0 | 0    | 0 | 0    | n.d. | n.d. |
| 71 | 0 | 0    | 0 | 0    | n.d. | n.d. | 0 | 0    | 0 | 0    | n.d. | n.d. |
| 72 | 2 | 230  | 2 | 110  | n.d. | n.d. | 1 | 313  | 1 | 780  | n.d. | n.d. |
| 73 | 1 | 967  | 0 | 0    | n.d. | n.d. | 0 | 0    | 0 | 0    | n.d. | n.d. |
| 74 | 0 | 0    | 0 | 0    | n.d. | n.d. | 0 | 0    | 0 | 0    | n.d. | n.d. |
| 75 | 0 | 0    | 0 | 0    | n.d. | n.d. | 0 | 0    | 0 | 0    | n.d. | n.d. |
| 76 | 3 | 923  | 3 | 867  | -    | -    | 2 | 330  | 3 | 357  | -    | -    |
| 77 | 1 | 213  | 1 | 363  | -    | -    | 1 | 233  | 1 | 353  | -    | -    |
| 78 | 0 | 0    | 3 | 1217 | -    | -    | 1 | 1677 | 4 | 2907 | -    | -    |
| 79 | 1 | 647  | 2 | 80   | -    | -    | 0 | 0    | 1 | 330  | -    | -    |
| 80 | 1 | 280  | 1 | 63   | -    | -    | 0 | 0    | 0 | 0    | -    | -    |
| 81 | 2 | 240  | 0 | 0    | -    | -    | 0 | 0    | 2 | 167  | -    | -    |
| 82 | 1 | 290  | 0 | 0    | -    | -    | 2 | 333  | 3 | 1457 | -    | -    |
| 83 | 1 | 1747 | 1 | 410  | -    | -    | 1 | 207  | 1 | 540  | -    | -    |
| 84 | 1 | 220  | 1 | 310  | -    | -    | 0 | 0    | 1 | 473  | -    | -    |
| 85 | 0 | 0    | 0 | 0    | -    | -    | 0 | 0    | 1 | 20   | -    | -    |

|    |   |      |    |      |   |   |   |     |   |      |   |   |
|----|---|------|----|------|---|---|---|-----|---|------|---|---|
| 86 | 0 | 0    | 1  | 73   | - | - | 0 | 0   | 1 | 193  | - | - |
| 87 | 0 | 0    | 0  | 0    | - | - | 0 | 0   | 1 | 100  | - | - |
| 88 | 0 | 0    | 0  | 0    | - | - | 0 | 0   | 0 | 0    | - | - |
| 89 | 9 | 2360 | 11 | 5560 | - | - | 6 | 883 | 6 | 5470 | - | - |
| 90 | 3 | 267  | 4  | 600  | - | - | 1 | 43  | 2 | 137  | - | - |
| 91 | 4 | 1904 | 2  | 1430 | - | - | 1 | 23  | 1 | 270  | - | - |
| 92 | 0 | 0    | 2  | 1013 | - | - | 0 | 0   | 0 | 0    | - | - |
| 93 | 0 | 0    | 2  | 633  | - | - | 2 | 127 | 0 | 0    | - | - |

| Allele    | Alpha chain | Percent of haplotypes | Phenotype frequency |
|-----------|-------------|-----------------------|---------------------|
| DPB1*0101 | DPA1*0201   | 8.4                   | 16.0                |
| DPB1*0201 | DPA1*0103   | 9.2                   | 17.5                |
| DPB1*0401 | DPA1*0103   | 20.1                  | 36.2                |
| DPB1*0402 | DPA1*0103   | 23.6                  | 41.6                |
| DPB1*0501 | DPA1*0202   | 11.5                  | 21.7                |
| DQB1*0201 | DQA1*0501   | 5.8                   | 11.3                |
| DQB1*0301 | DQA1*0501   | 19.5                  | 35.1                |
| DQB1*0302 | DQA1*0301   | 10.0                  | 19.0                |
| DQB1*0402 | DQA1*0401   | 6.6                   | 12.8                |
| DQB1*0501 | DQA1*0101   | 7.6                   | 14.6                |
| DQB1*0602 | DQA1*0102   | 7.6                   | 14.6                |
| DRB1*0101 | DRA1*0101   | 2.8                   | 5.4                 |
| DRB1*0102 | DRA1*0101   | 1.7                   | 3.3                 |
| DRB1*0301 | DRA1*0101   | 7.1                   | 13.7                |
| DRB1*0302 | DRA1*0101   | 1.1                   | 2.12                |
| DRB1*0401 | DRA1*0101   | 2.3                   | 4.6                 |
| DRB1*0402 | DRA1*0101   | 1.1                   | 2.18                |
| DRB1*0403 | DRA1*0101   | 2.3                   | 4.5                 |
| DRB1*0404 | DRA1*0101   | 1.9                   | 3.8                 |
| DRB1*0405 | DRA1*0101   | 3.1                   | 6.2                 |
| DRB1*0407 | DRA1*0101   | 2.4                   | 4.8                 |
| DRB1*0411 | DRA1*0101   | 1.6                   | 3.3                 |
| DRB1*0701 | DRA1*0101   | 7.0                   | 13.5                |
| DRB1*0802 | DRA1*0101   | 2.5                   | 4.9                 |
| DRB1*0803 | DRA1*0101   | 3.8                   | 7.4                 |
| DRB1*0901 | DRA1*0101   | 3.1                   | 6.2                 |
| DRB1*1001 | DRA1*0101   | 1.9                   | 3.8                 |
| DRB1*1101 | DRA1*0101   | 6.1                   | 11.8                |
| DRB1*1102 | DRA1*0101   | 1.1                   | 2.21                |
| DRB1*1103 | DRA1*0101   | 0.2                   | 0.50                |
| DRB1*1104 | DRA1*0101   | 1.4                   | 2.77                |
| DRB1*1201 | DRA1*0101   | 2.0                   | 3.9                 |
| DRB1*1301 | DRA1*0101   | 3.2                   | 6.3                 |
| DRB1*1302 | DRA1*0101   | 3.9                   | 7.7                 |
| DRB1*1303 | DRA1*0101   | 1.2                   | 2.40                |
| DRB1*1304 | DRA1*0101   | 0.1                   | 0.17                |
| DRB1*1401 | DRA1*0101   | 3.4                   | 6.7                 |
| DRB1*1402 | DRA1*0101   | 2.8                   | 5.6                 |
| DRB1*1501 | DRA1*0101   | 6.3                   | 12.2                |
| DRB1*1601 | DRA1*0101   | 1.0                   | 1.9                 |
| DRB1*1602 | DRA1*0101   | 3.9                   | 7.7                 |

|           |           |      |      |
|-----------|-----------|------|------|
| DRB3*0101 | DRA1*0101 | 14.0 | 26.1 |
| DRB3*0202 | DRA1*0101 | 18.9 | 34.3 |
| DRB3*0301 | DRA1*0101 | 7.6  | 14.5 |
| DRB4*0101 | DRA1*0101 | 23.7 | 41.8 |
| DRB5*0101 | DRA1*0101 | 8.3  | 16.0 |
| DRB5*0102 | DRA1*0101 | 5.1  | 9.8  |

---

ACCEPTED MANUSCRIPT

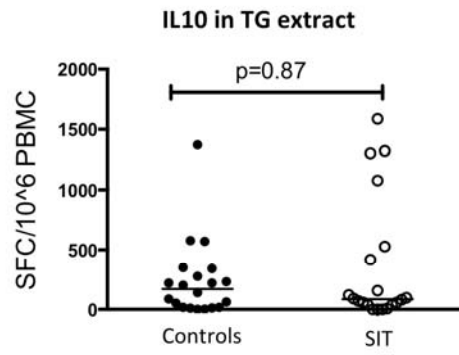

ACCEPTED MANUSCRIPT

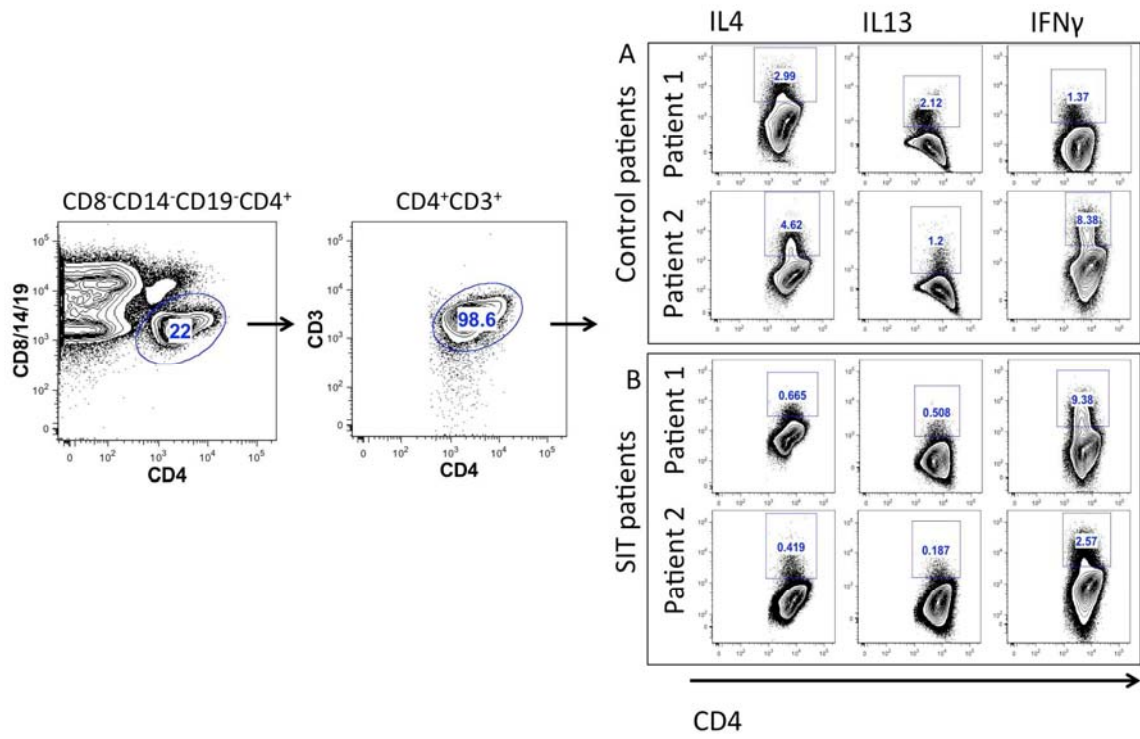

Supplement: NIHMS602444-supplement-supplement_1.pdf [file NIHMS602444-supplement-supplement_1.pdf]
